# Supplementary material for: Phylotranscriptomics reveals the phylogeny of Asparagales and the evolution of allium flavor biosynthesis
Source: Research Square preprint supplement (doi:10.21203/rs.3.rs-4312784/v1), 2024-05-06
Supplement: Supplementary file 1 [file 0b714494c7b27e83814c5e64.xlsx]

## Sheet: Table legends
Table S1. Samples information.
Table S2. Calibration points used for divergence time estimation in this study.
Table S3. Divergence time estimated in this study and previous studies.
Table S4. Number of taxa used for grafting in biogeographic analyses.
Table S5. Biogeography of Asparagales compiled from previous studies.
Table S6. Qualitative identification of S-alk(en)ylcysteine sulfoxides and their precursors.
Table S7. Gene used as baits to identify homolog genes and Pfam accession numbers used for filtering.
Table S8. Number of genes copy for genes involved in CSO biosynthetic pathway.
Table S9. Comparision of gene copy number.
Table S10. Models of gene duplication investigated using DupGen_finder-unique.
Table S11. Expression level for genes in CSO biosynthetic pathway. Expression level was measured using transcript per million (TPM).
Table S12. Species used for gene motif analyses. All of these species have whole-genome sequencing data available.
Table S13. Allium-specific amino acid changes. Numbers above amimo acid sequences indicate the sites coresponding to the sequences of bait genes (Supplementary Table 7).
Table S14. Active sites and site located in binding pockets of proteins accessed from previous studies or molecualr docking in this study.

## Sheet: Table S1 Samples
Table S1. Samples information.
Classes	Families	Species names	Collectors and voucher nos. for samples collected in this study	Collecting locations and date for samples collected in this study	Data resources/SRA IDs	Platforms	Species abbreviations
Asparagales	Amaryllidaceae	Agapanthus africanus (L.) Hoffmanns.	Not checked	Not checked	ERR2040716	Illumina HiSeq 2000	agapaafric
Asparagales	Amaryllidaceae	Agapanthus praecox subsp. orientalis (F.M.Leight.) F.M.Leight	Not checked	Not checked	SRR850813	Illumina HiSeq 2000	agapapraec
Asparagales	Amaryllidaceae	Allium ampeloprasum L.	Not checked	Not checked	SRR3144541	Illumina HiSeq 2500	alliuampel
Asparagales	Amaryllidaceae	Allium angulosum L.	Not checked	Not checked	SRR9077156	NextSeq 500	alliuangul
Asparagales	Amaryllidaceae	Allium anisopodium Ledeb.	Xiaowei Xin, Lingyun Chen	Cultivated in Medicinal Botanical Garden, Shandong Drug and Food Vocational College, Shandong, China. July-26 2022	XXXXXXXXXX	BGI T7	allani
Asparagales	Amaryllidaceae	Allium ascalonicum L	Not checked	Not checked	SRR3144570	Illumina HiSeq 2500	alliuascal
Asparagales	Amaryllidaceae	Allium brevidentatum F.Z.Li	Xiaowei Xin, Lingyun Chen	Cultivated in Medicinal Botanical Garden, Shandong Drug and Food Vocational College, Shandong, China. July-26 2022	XXXXXXXXXX	BGI T7	allbre
Asparagales	Amaryllidaceae	Allium cepa L.	Not checked	Not checked	v1.2, accessed from https://www.oniongenome.wur.nl/	Illumina HiSeq 2500	alliucepav12
Asparagales	Amaryllidaceae	Allium chinense G.Don	Not checked	Not checked	SRR3144560	Illumina HiSeq 2500	alliuchine
Asparagales	Amaryllidaceae	Allium commutatum Guss	Not checked	Not checked	ERR2040722	Illumina HiSeq 2000	alliucommu
Asparagales	Amaryllidaceae	Allium cyathophorum var. farreri (Stearn) Stearn	Not checked	Not checked	SRR10828152	Illumina HiSeq 2500	alliucyath
Asparagales	Amaryllidaceae	Allium ericetorum Thore	Not checked	Not checked	SRR9077153	NextSeq 500	alliuerice
Asparagales	Amaryllidaceae	Allium fistulosum L.	Ying Hu, Xiongbiao Xu, Zhiyuan Wei, SY00942 (GXMG)	Pharmaceutical Botanical Garden of Shenyang Pharmaceutical University, Shenyang,Liaoning. September-13 2018	XXXXXXXXXX	BGI T7	alliufistu
Asparagales	Amaryllidaceae	Allium stipitatum Regel	Not checked	Not checked	SRR13285938	Illumina NovaSeq 6000	alliuhirti
Asparagales	Amaryllidaceae	Allium hookeri Thwaites	Ying Hu, Xiaomei Wei, Xiongbiao Xu, Renjun Mao, Zhiyuan Wei, CQ00839 (GXMG)	Chongqing Research Institute of Drug Planting, Sanquan, Nanchuan, Chongqing. November-3 2018	XXXXXXXXXX	BGI T7	alliuhooke
Asparagales	Amaryllidaceae	Allium listera Stearn	Not checked	Not checked	SRR11818591	Illumina HiSeq 4000	alliuliste
Asparagales	Amaryllidaceae	Allium macranthum Baker	Ying Hu, Xiaomei Wei, XueYang Hu, Yude Peng, SC13013 (GXMG)	Mugecuo, Luding, Sichuan. July-30 2021	XXXXXXXXXX	BGI T7	alliumacra
Asparagales	Amaryllidaceae	Allium macrostemon Bunge	Ying Hu, Xiaomei Wei, Xiongbiao Xu, Renjun Mao, Zhiyuan Wei, CQ00896 (GXMG)	Chongqing Research Institute of Drug Planting, Sanquan, Nanchuan, Chongqing. November-3 2018	XXXXXXXXXX	BGI T7	alliumacro896
Asparagales	Amaryllidaceae	Allium macrostemon Bunge	Ying Hu, Xiaomei Wei, Yang Lin, SX12819 (GXMG)	Taibai Mountain, Mei County, Shaanxi. June-10 2021	XXXXXXXXXX	BGI T7	alliumacro12819
Asparagales	Amaryllidaceae	Allium mairei H.Lév.	Not checked	Not checked	SRR10828149	Illumina HiSeq 2500	alliumaire
Asparagales	Amaryllidaceae	Allium mongolicum Regel	Not checked	Not checked	SRR8704488	Illumina HiSeq 2000	alliumongo
Asparagales	Amaryllidaceae	Allium neriniflorum (Herb.) G.Don	Xiaowei Xin, Lingyun Chen	Cultivated in Medicinal Botanical Garden, Shandong Drug and Food Vocational College, Shandong, China. July-26 2022	XXXXXXXXXX	BGI T7	allner
Asparagales	Amaryllidaceae	Allium nutans L.	Not checked	Not checked	SRR9077154	NextSeq 500	alliunutan
Asparagales	Amaryllidaceae	Allium paepalanthoides Airy Shaw	Ying Hu, Xiongbiao Xu, Zhiyuan Wei, CC00567 (GXMG)	Changchun University of Chinese Medicine Seven Stars Hundred Grass Garden, Changchun, Jilin. September-10 2018	XXXXXXXXXX	BGI T7	alliupaepa
Asparagales	Amaryllidaceae	Allium polyrhizum Turcz. ex Regel	Xiaowei Xin, Lingyun Chen	Cultivated in Medicinal Botanical Garden, Shandong Drug and Food Vocational College, Shandong, China. July-26 2022	XXXXXXXXXX	BGI T7	allpol
Asparagales	Amaryllidaceae	Allium prattii C.H.Wright	Ying Hu, Yang Lin, Changqian Quan, Ningfen Li, SX11134 (GXMG)	Taibai, Mei County, Shaanxi. July-22 2020	XXXXXXXXXX	BGI T7	alliupratt34
Asparagales	Amaryllidaceae	Allium prattii C.H.Wright	Ying Hu, Xiaomei Wei, XueYang Hu, Yude Peng, SC12972 (GXMG)	Red Stone Park, Luding, Sichuan. July-28 2021	XXXXXXXXXX	BGI T7	alliupratt972
Asparagales	Amaryllidaceae	Allium prostratum Trevir.	Xiaowei Xin, Lingyun Chen	Cultivated in Medicinal Botanical Garden, Shandong Drug and Food Vocational College, Shandong, China. July-26 2022	XXXXXXXXXX	BGI T7	allpro
Asparagales	Amaryllidaceae	Allium przewalskianum Regel	Not checked	Not checked	SRR10828148	Illumina HiSeq 2500	alliuprzew
Asparagales	Amaryllidaceae	Allium ramosum L.	Xiaomei Wei, Yang Lin, Ningfen Li, Xueyang Hu, JN11537 (GXMG)	Yunti Mountain, JiNot checkedn, Shandong. September-3 2020	XXXXXXXXXX	BGI T7	alliuramos
Asparagales	Amaryllidaceae	Allium sativum L.	Not checked	Not checked	https://figshare.com/search?q=garlic (Dataset posted on 2020-06-24)	Illumina NovaSeq 6000	Garlic20624
Asparagales	Amaryllidaceae	Allium schoenoprasum L.	Not checked	Not checked	SRR19650911	HiSeq X Ten	alliuschoe
Asparagales	Amaryllidaceae	Allium spicatum (Prain) N.Friesen	Not checked	Not checked	SRR17276198	Illumina NovaSeq 6000	alliuspica
Asparagales	Amaryllidaceae	Allium taishanense J.M.Xu	Xiaowei Xin, Lingyun Chen	Cultivated in Medicinal Botanical Garden, Shandong Drug and Food Vocational College, Shandong, China. July-26 2022	XXXXXXXXXX	BGI T7	alltai
Asparagales	Amaryllidaceae	Allium tenuissimum L.	Xiaowei Xin, Lingyun Chen	Cultivated in Medicinal Botanical Garden, Shandong Drug and Food Vocational College, Shandong, China. July-26 2022	XXXXXXXXXX	BGI T7	alltenui
Asparagales	Amaryllidaceae	*Allium tetraploideum M.J.Li & X.J.He	Not checked	Not checked	SRR10828151	Illumina HiSeq 2500	alliutetra
Asparagales	Amaryllidaceae	Allium thunbergii G.Don	Xiaowei Xin, Lingyun Chen	Cultivated in Medicinal Botanical Garden, Shandong Drug and Food Vocational College, Shandong, China. July-26 2022	XXXXXXXXXX	BGI T7	allthu
Asparagales	Amaryllidaceae	Allium tuberosum Rottler ex Spreng.	Ying Hu, Xiaomei Wei, Meiqiong Tang, YY00327 (GXMG)	Guangxi Botanical Garden of Medicinal Plants, Nanning, Guangxi. June-4 2018	XXXXXXXXXX	BGI T7	alliutuber
Asparagales	Amaryllidaceae	Allium tuberosum Rottler ex Spreng.	Ying Hu, Xiaomei Wei, Xiongbiao Xu, Renjun Mao, Zhiyuan Wei, CQ00617 (GXMG)	Chongqing Research Institute of Drug Planting, Sanquan, Nanchuan, Chongqing. November-2 2018	XXXXXXXXXX	BGI T7	allituber
Asparagales	Amaryllidaceae	Allium ursinum L.	Not checked	Not checked	SRR9077159	NextSeq 500	alliuursin
Asparagales	Amaryllidaceae	Allium victorialis L.	Ying Hu, Xiongbiao Xu, Zhiyuan Wei, CC00461 (GXMG)	Jilin Agricultural University Pharmaceutical Botanical Garden, Changchun, Jilin. September-8 2018	XXXXXXXXXX	BGI T7	alliuvicto461
Asparagales	Amaryllidaceae	Allium wallichii Kunth	Ying Hu, Xiaomei Wei, Meiqiong Tang, YY00274 (GXMG)	Guangxi Botanical Garden of Medicinal Plants, Nanning, Guangxi. May-31 2018	XXXXXXXXXX	BGI T7	alliuwalli274
Asparagales	Amaryllidaceae	Allium wallichii Kunth	Ying Hu, Xiaomei Wei, Xiongbiao Xu, Renjun Mao, Zhiyuan Wei, EM00238 (GXMG)	Xingrong, shichuanzhu, Emei Mountain, Sichuan. October-22 2018	XXXXXXXXXX	BGI T7	alliuwalli238
Asparagales	Amaryllidaceae	Amaryllis belladonna L.	Not checked	Not checked	ERR2040723	Illumina Genome Analyzer II	amarybella
Asparagales	Amaryllidaceae	Clivia miniata (Lindl.) Bosse	Ying Hu, Xiongbiao Xu, Zhiyuan Wei, SY00934 (GXMG)	Pharmaceutical Botanical Garden of Shenyang Pharmaceutical University, Shenyang, Liaoning. September-13 2018	XXXXXXXXXX	BGI T7	cliviminia
Asparagales	Amaryllidaceae	Crinum asiaticum var. sinicum (Roxb. ex Herb.) Baker	Ying Hu, Xiongbiao Xu, Zhiyuan Wei, CC00615 (GXMG)	Changchun University of Chinese Medicine Seven Stars Hundred Grass Garden, Changchun, Jilin. September-10 2018	XXXXXXXXXX	BGI T7	crinuasiat615
Asparagales	Amaryllidaceae	Crinum asiaticum var. sinicum (Roxb. ex Herb.) Baker	Ying Hu, Xiaomei Wei, Xiongbiao Xu, Renjun Mao, Zhiyuan Wei, CQ00818 (GXMG)	Chongqing Research Institute of Drug Planting, Sanquan, Nanchuan, Chongqing. November-2 2018	XXXXXXXXXX	BGI T7	crinuasiati818
Asparagales	Amaryllidaceae	Galanthus elwesii Hook.f.	Not checked	Not checked	SRR3038644	Illumina HiSeq 2000	galanelwes
Asparagales	Amaryllidaceae	Galanthus sp. MBK-2015	Not checked	Not checked	SRR3048278	Illumina HiSeq 2000	galant278
Asparagales	Amaryllidaceae	Scadoxus multiflorus (Martyn) Raf	Ying Hu, Xiaomei Wei, Meiqiong Tang, YY00121 (GXMG)	Guangxi Botanical Garden of Medicinal Plants, Nanning, Guangxi. May-24 2018	XXXXXXXXXX	BGI T7	haemamulti
Asparagales	Amaryllidaceae	Hippeastrum sp.	Not checked	Not checked	SRR3547250	Illumina HiSeq 2000	hippea250
Asparagales	Amaryllidaceae	Hippeastrum striatum (Lam.) H.E.Moore	Ying Hu, Xiaomei Wei, Xiongbiao Xu, Renjun Mao, Zhiyuan Wei, CQ00841 (GXMG)	Chongqing Research Institute of Drug Planting, Sanquan, Nanchuan, Chongqing. November-3 2018	XXXXXXXXXX	BGI T7	hipperutil841
Asparagales	Amaryllidaceae	Hippeastrum striatum (Lam.) H.E.Moore	Ying Hu, Xiaomei Wei, Meiqiong Tang, YY00159 (GXMG)	Guangxi Botanical Garden of Medicinal Plants, Nanning, Guangxi. May-25 2018	XXXXXXXXXX	BGI T7	hipperutil159
Asparagales	Amaryllidaceae	Hippeastrum vittatum (L'Hér.) Herb.	Not checked	Not checked	SRR20646617	Illumina NovaSeq 6000	hippevitta
Asparagales	Amaryllidaceae	Leucojum aestivum L.	Not checked	Not checked	SRR14196981	Illumina HiSeq 2000	leucoaesti
Asparagales	Amaryllidaceae	Lycoris aurea (L'Hér.) Herb.	Ying Hu, Xiaomei Wei, Xiongbiao Xu, Renjun Mao, Zhiyuan Wei, CQ00764 (GXMG)	Chongqing Research Institute of Drug Planting, Sanquan, Nanchuan, Chongqing. November-2 2018	XXXXXXXXXX	BGI T7	lycoraurea
Asparagales	Amaryllidaceae	Lycoris chinensis Traub	Not checked	Not checked	SRR19578267	Illumina HiSeq 2500	lycorchine
Asparagales	Amaryllidaceae	Lycoris longituba Y.C.Hsu & G.J.Fan	Not checked	Not checked	SRR10572829	HiSeq X Ten	lycorlongi
Asparagales	Amaryllidaceae	Lycoris radiata (L'Hér.) Herb.	Ying Hu, Xiaomei Wei, Xiongbiao Xu, Renjun Mao, Zhiyuan Wei,CQ00804 (GXMG)	Chongqing Research Institute of Drug Planting, Sanquan, Nanchuan, Chongqing. November-2 2018	XXXXXXXXXX	BGI T7	lycorradia804
Asparagales	Amaryllidaceae	Lycoris radiata (L'Hér.) Herb.	Xiaomei Wei, Zhu Qiao, Yang Lin, Yanfen Huang, XA00411 (GXMG)	Xian Botanical Garden, Xian, Shaanxi. September-3 2018	XXXXXXXXXX	BGI T7	lycorcapit
Asparagales	Amaryllidaceae	Lycoris radiata (L'Hér.) Herb.	Ying Hu, Xiaomei Wei, Xiongbiao Xu, Renjun Mao, Zhiyuan Wei, CQ00935 (GXMG)	Chongqing Research Institute of Drug Planting, Sanquan, Nanchuan, Chongqing. November-3 2018	XXXXXXXXXX	BGI T7	lycorradiat935
Asparagales	Amaryllidaceae	Lycoris sprengeri Comes ex Baker	Not checked	Not checked	SRR13966063	Illumina HiSeq 2500	lycorspren
Asparagales	Amaryllidaceae	*Narcissus papyraceus Ker Gawl.	Not checked	Not checked	SRR6041662	Illumina HiSeq 2000	narcipapyr
Asparagales	Amaryllidaceae	Narcissus pseudonarcissus L.	Not checked	Not checked	SRR8115251	Illumina HiSeq 4000	narcipseud
Asparagales	Amaryllidaceae	Narcissus tazetta L.	Not checked	Not checked	SRR4071976	Illumina HiSeq 2500	narcitazet
Asparagales	Amaryllidaceae	Narcissus viridiflorus	Not checked	Not checked	ERR2040724	Illumina HiSeq 2000	narcivirid
Asparagales	Amaryllidaceae	*Phycella chilensis (L'Hér.) Grau ex Nic.García	Not checked	Not checked	ERR2040726	Illumina HiSeq 2000	phycechile
Asparagales	Amaryllidaceae	Phycella sp. 1KP	Not checked	Not checked	ERR3487375	Illumina HiSeq 2000	phycel
Asparagales	Amaryllidaceae	Traubia modesta (Phil.) Ravenna	Not checked	Not checked	ERR2040727	Illumina HiSeq 2000	traubmodes
Asparagales	Amaryllidaceae	Tulbaghia violacea Harv.	Not checked	Not checked	SRR9077157	NextSeq 500	tulbaviola
Asparagales	Amaryllidaceae	Zephyranthes candida (Lindl.) Herb	Ying Hu, Xiaomei Wei, Xiongbiao Xu, Renjun Mao, Zhiyuan Wei, CQ00669 (GXMG)	Chongqing Research Institute of Drug Planting, Sanquan, Nanchuan, Chongqing. November-2 2018	XXXXXXXXXX	BGI T7	zephycandi
Asparagales	Amaryllidaceae	Zephyranthes carinata Herb.	Ying Hu, Xiaomei Wei, Xiongbiao Xu, Renjun Mao, Zhiyuan Wei, CQ00834 (GXMG)	Chongqing Research Institute of Drug Planting, Sanquan, Nanchuan, Chongqing. November-3 2018	XXXXXXXXXX	BGI T7	zephycarin
Asparagales	Amaryllidaceae	Zephyranthes treatiae S.Watson	Not checked	Not checked	ERR2040728	Illumina HiSeq 2000	zephytreat
Asparagales	Asparagaceae	Agave americana L.	Not checked	Not checked	SRR1371285	Illumina HiSeq 2000	agaveameri
Asparagales	Asparagaceae	Agave amica (Medik.) Thiede & Govaerts	Not checked	Not checked	SRR12903900	NextSeq 500	agaveamica
Asparagales	Asparagaceae	Agave vivipara L.	Not checked	Not checked	SRR15059310	Illumina NovaSeq 6000	agaveangus
Asparagales	Asparagaceae	Agave bracteosa S.Watson ex Engelm	Not checked	Not checked	SRR5687764	NextSeq 500	agavebract
Asparagales	Asparagaceae	Agave cantula Roxb.	Not checked	Not checked	SRR22114997	Illumina NovaSeq 6000	agavecantu
Asparagales	Asparagaceae	Agave deserti Engelm.	Not checked	Not checked	SRR787652	Illumina HiSeq 2000	agavedeser
Asparagales	Asparagaceae	Agave fourcroydes Lem.	Not checked	Not checked	SRR15143219	Illumina HiSeq 4000	agavefourc
Asparagales	Asparagaceae	*Agave lecheguilla Torr.	Not checked	Not checked	SRR11230731	Illumina HiSeq 2000	agaveleche
Asparagales	Asparagaceae	Agave salmiana Otto ex Salm-Dyck	Not checked	Not checked	SRR5973485	Illumina HiSeq 2500	agavesalmi
Asparagales	Asparagaceae	Manfreda scabra (Ortega) McVaugh	Not checked	Not checked	SRR5687669	NextSeq 500	agavescabr
Asparagales	Asparagaceae	Agave sisalana Perrine	Not checked	Not checked	SRR6668799	Illumina HiSeq 2000	agavesisal
Asparagales	Asparagaceae	Agave tequilana F.A.C.Weber	Not checked	Not checked	SRR789727	Illumina HiSeq 2000	agavetequi
Asparagales	Asparagaceae	Agave sp.	Not checked	Not checked	SRR23702550	Illumina NovaSeq 6000	agavasp
Asparagales	Asparagaceae	Anemarrhena asphodeloides Bunge	Not checked	Not checked	SRR19179856	Illumina HiSeq 2000	anemaaspho
Asparagales	Asparagaceae	Asparagus asparagoides (L.) Druce	Not checked	Not checked	SRR3708234	Illumina HiSeq 2000	asparaspar
Asparagales	Asparagaceae	Asparagus cochinchinensis (Lour.) Merr.	Not checked	Not checked	SRR5288363	Illumina HiSeq 2000	asparcochi
Asparagales	Asparagaceae	Asparagus densiflorus (Kunth) Jessop	Not checked	Not checked	ERR2040729	Illumina HiSeq 2000	aspardensi
Asparagales	Asparagaceae	Asparagus kiusianus Makino	Not checked	Not checked	AKIK1p2_r1.0, accessed from https://plantgarden.jp/en/list/t272855/genome/t272855.G002	Illumina HiSeq 2500	asparkiusi855
Asparagales	Asparagaceae	Asparagus officinalis L.	Not checked	Not checked	Genome assembly Aspof.V1, accessed from https://www.ncbi.nlm.nih.gov/datasets/genome/GCF_001876935.1/	Illumina HiSeq 2500	asparoffic7340
Asparagales	Asparagaceae	Asparagus racemosus Willd.	Not checked	Not checked	SRR6161787	Illumina HiSeq 2500	asparracem
Asparagales	Asparagaceae	Asparagus setaceus (Kunth) Jessop	Not checked	Not checked	SRR10186988	HiSeq X Ten	asparsetac
Asparagales	Asparagaceae	Asparagus sp.	Not checked	Not checked	SRR21865116	Illumina NovaSeq 6000	aspar116
Asparagales	Asparagaceae	Aspidistra fenghuangensis K.Y.Lang	Not checked	Not checked	SRR11190988	Illumina HiSeq 2000	aspidfengh
Asparagales	Asparagaceae	Aspidistra saxicola Y.Wan	Not checked	Not checked	SRR917963	Illumina HiSeq 2000	aspidsaxic
Asparagales	Asparagaceae	Aphyllanthes monspeliensis L	Not checked	Not checked	SRR19179833	Illumina HiSeq 2000	aphylmonsp
Asparagales	Asparagaceae	Barnardia japonica (Thunb.) Schult. & Schult.f.	Xiaowei Xin, Lingyun Chen	Cultivated in Medicinal Botanical Garden, Shandong Drug and Food Vocational College, Shandong, China. July-26 2022	XXXXXXXXXX	BGI T7	barjap
Asparagales	Asparagaceae	Behnia reticulata (Thunb.) Didr	Not checked	Not checked	SRR19179834	Illumina HiSeq 2000	behniretic
Asparagales	Asparagaceae	Beschorneria yuccoides K.Koch	Not checked	Not checked	SRR5687696	NextSeq 500	beschyucco
Asparagales	Asparagaceae	Brodiaea sierrae R.E.Preston	Not checked	Not checked	ERR2040751	Illumina Genome Analyzer II	brodisierr
Asparagales	Asparagaceae	Chlorogalum pomeridianum (DC.) Kunth	Not checked	Not checked	ERR2040719	Illumina HiSeq 2000	chlorpomer
Asparagales	Asparagaceae	Chlorophytum rhizopendulum Bjorå & Hemp	Not checked	Not checked	SRR402444	Illumina Genome Analyzer IIx	chlorrhizo
Asparagales	Asparagaceae	Convallaria keiskei Miq.	Not checked	Not checked	SRR8298304	Illumina HiSeq 2000	convakeisk
Asparagales	Asparagaceae	*Convallaria pseudomajalis	Not checked	Not checked	SRR8298305	Illumina HiSeq 2000	convapseud
Asparagales	Asparagaceae	Cordyline australis (G.Forst.) Endl.	Not checked	Not checked	SRR5257973	Illumina HiSeq 2500	cordyaustr
Asparagales	Asparagaceae	*Disporopsis pernyi Diels	Not checked	Not checked	ERR2040731	Illumina HiSeq 2000	dispoperny
Asparagales	Asparagaceae	Dracaena cambodiana Pierre ex Gagnep	Not checked	Not checked	SRR17728327	Illumina NovaSeq 6000	dracacambo
Asparagales	Asparagaceae	Dracaena cochinchinensis (Lour.) S.C.Chen	Not checked	Not checked	SRR13611629	Sequel II	dracacochi
Asparagales	Asparagaceae	Dracaena marginata hort.	Not checked	Not checked	SRR12494544	Illumina HiSeq 2000	dracamargi
Asparagales	Asparagaceae	Drimia altissima (L.f.) Ker Gawl.	Not checked	Not checked	ERR2040736	Illumina HiSeq 2000	drimialtis
Asparagales	Asparagaceae	Eriospermum lanceifolium Jacq.	Not checked	Not checked	ERR3487382	Illumina HiSeq 2000	erioslance
Asparagales	Asparagaceae	Hemiphylacus alatostylus L.Hern	Not checked	Not checked	SRR19179836	Illumina HiSeq 2000	hemipalato
Asparagales	Asparagaceae	Hesperaloe parviflora (Torr.) J.M.Coult.	Not checked	Not checked	ERR2040720	Illumina HiSeq 2000	hespeparvi
Asparagales	Asparagaceae	Hosta clausa Nakai	Not checked	Not checked	SRR10901763	HiSeq X Ten	hostaclaus
Asparagales	Asparagaceae	Hosta plantaginea (Lam.) Asch.	Not checked	Not checked	SRR9046726	Illumina HiSeq 4000	hostaplant
Asparagales	Asparagaceae	Hosta sp.	Not checked	Not checked	SRR402443	Illumina Genome Analyzer IIx	hostasp
Asparagales	Asparagaceae	Hosta ventricosa Stearn	Not checked	Not checked	SRR13871374	Illumina HiSeq 4000	hostaventri
Asparagales	Asparagaceae	Hosta venusta F.Maek.	Not checked	Not checked	SRR15506205	NextSeq 500	hostavenus
Asparagales	Asparagaceae	Liriope muscari (Decne.) L.H.Bailey	Not checked	Not checked	SRR12175248	Illumina HiSeq 2000	liriomudsca
Asparagales	Asparagaceae	Liriope spicata Lour.	Not checked	Not checked	SRR15803256	Illumina HiSeq 2500	liriospica
Asparagales	Asparagaceae	Lomandra longifolia Labill.	Not checked	Not checked	SRR3748876	Illumina HiSeq 2500	lomanlongi
Asparagales	Asparagaceae	Maianthemum canadense Desf.	Not checked	Not checked	ERR2040730	Illumina HiSeq 2000	maiancanad
Asparagales	Asparagaceae	Maianthemum sp. 1KP	Not checked	Not checked	ERR3487376	Illumina HiSeq 2000	maian376
Asparagales	Asparagaceae	Manfreda sp. KH-2017	Not checked	Not checked	SRR5687693	NextSeq 500	manfre
Asparagales	Asparagaceae	Muscari armeniacum Leichtlin ex Baker	Not checked	Not checked	SRR998853	Illumina HiSeq 1000	muscaarmen
Asparagales	Asparagaceae	Nolina atopocarpa Bartlett	Not checked	Not checked	ERR2040746	Illumina HiSeq 2000	nolinatopo
Asparagales	Asparagaceae	Nolina bigelovii (Torr.) S.Watson	Not checked	Not checked	ERR2040747	Illumina HiSeq 2000	nolinbigel
Asparagales	Asparagaceae	Ornithogalum sp.	Not checked	Not checked	SRR8380847	Illumina HiSeq 2500	ornit
Asparagales	Asparagaceae	Peliosanthes teta Andrews	Not checked	Not checked	ERR2040748	Illumina HiSeq 2000	pelioteta
Asparagales	Asparagaceae	Polygonatum cyrtonema Hua	Not checked	Not checked	SRR19025959	Illumina NovaSeq 6000	polygcyrto
Asparagales	Asparagaceae	Polygonatum kingianum Collett & Hemsl.	Not checked	Not checked	SRR7451552	Illumina HiSeq 4000	polygkingi
Asparagales	Asparagaceae	Polygonatum odoratum (Mill.) Druce	Not checked	Not checked	SRR8252894	Illumina HiSeq 4000	polygodora
Asparagales	Asparagaceae	Polygonatum sibiricum F.Delaroche	Not checked	Not checked	SRR8935704	Illumina HiSeq 4000	polygsibir
Asparagales	Asparagaceae	Polygonatum sp.	Not checked	Not checked	SRR17326967	Illumina HiSeq 4000	polyg967
Asparagales	Asparagaceae	Ruscus sp. 1KP	Not checked	Not checked	ERR3487381	Illumina HiSeq 2000	ruscusp
Asparagales	Asparagaceae	Sansevieria trifasciata Prain	Not checked	Not checked	ERR2040745	Illumina Genome Analyzer II	sansetrifa
Asparagales	Asparagaceae	Scilla peruviana L.	Not checked	Not checked	SRR9077161	NextSeq 500	scillperuv
Asparagales	Asparagaceae	Drimia maritima (L.) Stearn	Not checked	Not checked	ERR2040735	Illumina HiSeq 2000	squillmarit
Asparagales	Asparagaceae	Yucca aloifolia L.	Not checked	Not checked	SRR6603983	NextSeq 500	yuccaaloif
Asparagales	Asparagaceae	Yucca brevifolia Engelm.	Not checked	Not checked	ERR2040718	Illumina HiSeq 2000	yuccabrevi
Asparagales	Asparagaceae	Yucca filamentosa L.	Not checked	Not checked	SRR6374709	Illumina HiSeq 2000	yuccafilam
Asparagales	Asparagaceae	Yucca gloriosa L.	Not checked	Not checked	SRR6604009	Illumina HiSeq 2500	yuccaglori
Asparagales	Asphodelaceae	Aloe dichotoma Masson	Xiaomei Wei, Yang Lin, Ningfen Li, Xueyang Hu, NJ11210 (GXMG)	Nanjing Zhongshan Botanical Garden, Nannjing, Jiangsu. August-28 2020	XXXXXXXXXX	BGI T7	aloedicho
Asparagales	Asphodelaceae	Aloe somaliensis C.H.Wright ex W.Watson	Xiaomei Wei, Yang Lin, Ningfen Li, Xueyang Hu, NJ11211 (GXMG)	Nanjing Zhongshan Botanical Garden, Nannjing, Jiangsu. August-28 2020	XXXXXXXXXX	BGI T7	aloesomal
Asparagales	Asphodelaceae	Aloe vera (L.) Burm.f.	Not checked	Not checked	SRR11870895	Illumina NovaSeq 6000	aloevera
Asparagales	Asphodelaceae	Dianella ensifolia (L.) DC.	Ying Hu, Xiaomei Wei, Meiqiong Tang, YY00549 (GXMG)	Guangxi Botanical Garden of Medicinal Plants, Nanning, Guangxi. June-22 2018	XXXXXXXXXX	BGI T7	dianeensif549
Asparagales	Asphodelaceae	Dianella ensifolia (L.) DC.	Ying Hu, Xiaomei Wei, Xiongbiao Xu, Renjun Mao, Zhiyuan Wei, CQ00673 (GXMG)	Chongqing Research Institute of Drug Planting, Sanquan, Nanchuan, Chongqing. November-2 2018	XXXXXXXXXX	BGI T7	dianeensif673
Asparagales	Asphodelaceae	Haworthia cooperi Baker	Not checked	Not checked	SRR12567440	HiSeq X Ten	haworcoope
Asparagales	Asphodelaceae	Hemerocallis citrina Baroni	Ying Hu, Xiongbiao Xu, Zhiyuan Wei, CC00404 (GXMG)	Jilin Agricultural University Pharmaceutical Botanical Garden, Changchun, Jilin. September-7 2018	XXXXXXXXXX	BGI T7	hemercitri404
Asparagales	Asphodelaceae	Hemerocallis citrina Baroni	Ying Hu, Xiaomei Wei, Xiongbiao Xu, Renjun Mao, Zhiyuan Wei, CQ00907 (GXMG)	Chongqing Research Institute of Drug Planting, Sanquan, Nanchuan, Chongqing. November-3 2018	XXXXXXXXXX	BGI T7	hemercitri907
Asparagales	Asphodelaceae	Hemerocallis fulva (L.) L.	Ying Hu, Xiaomei Wei, Meiqiong Tang, YY00230 (GXMG)	Guangxi Botanical Garden of Medicinal Plants, Nanning, Guangxi. May-29 2018	XXXXXXXXXX	BGI T7	hemerfulva230
Asparagales	Asphodelaceae	Hemerocallis fulva (L.) L.	Ying Hu, Xiongbiao Xu, Zhiyuan Wei, CC00405 (GXMG)	Jilin Agricultural University Pharmaceutical Botanical Garden, Changchun, Jilin. September-7 2018	XXXXXXXXXX	BGI T7	hemerfulva405
Asparagales	Asphodelaceae	Hemerocallis fulva (L.) L.	Ying Hu, Xiaomei Wei, Xiongbiao Xu, Renjun Mao, Zhiyuan Wei, EM00248 (GXMG)	Xingrong, shichuanzhu, Emei Mountain, Sichuan. October-22 2018	XXXXXXXXXX	BGI T7	hemerfulva
Asparagales	Asphodelaceae	Hemerocallis lilioasphodelus L.	Not checked	Not checked	SRR6954705	Illumina HiSeq 2500	hemerlilio
Asparagales	Asphodelaceae	Hemerocallis sp.	Not checked	Not checked	SRR12104907	HiSeq X Ten	hemer907
Asparagales	Asphodelaceae	Hemerocallis sp.1KP-A	Not checked	Not checked	ERR3487377	Illumina HiSeq 2000	hemero377
Asparagales	Asphodelaceae	Hemerocallis sp.1KP-B	Not checked	Not checked	ERR3487378	Illumina HiSeq 2000	hemeroc378
Asparagales	Asphodelaceae	Johnsonia pubescens Lindl.	Not checked	Not checked	ERR2040752	Illumina HiSeq 2000	johnspubes
Asparagales	Asphodelaceae	Kniphofia uvaria (L.) Oken	Xiaomei Wei, Yang Lin, Ningfen Li, Xueyang Hu, NJ11227 (GXMG)	Nanjing Zhongshan Botanical Garden, Nannjing, Jiangsu. August-29 2020	XXXXXXXXXX	BGI T7	kniphuvari
Asparagales	Asphodelaceae	Phormium tenax J.R.Forst. & G.Forst.	Not checked	Not checked	SRR4684028	Illumina HiSeq 2500	phormtenax
Asparagales	Asteliaceae	Astelia pumila (J.R.Forst.) Gaudich.	Not checked	Not checked	SRR7632719	Illumina HiSeq 2000	astelpumil
Asparagales	Boryaceae	Borya sphaerocephala R.Br.	Not checked	Not checked	ERR2040733	Illumina HiSeq 2000	boryasphae
Asparagales	Doryanthaceae	Doryanthes excelsa Corrêa	Not checked	Not checked	SRR19179835	Illumina HiSeq 2000	doryaexcel
Asparagales	Hypoxidaceae	Molineria capitulata (Lour.) Herb	Xiaomei Wei, Zhu Qiao, Yang Lin, Yanfen Huang, XA00471 (GXMG)	Xian Botanical Garden, Xian, Shaanxi. September-3 2018	XXXXXXXXXX	BGI T7	curcucapit
Asparagales	Hypoxidaceae	Molineria crassifolia Baker	Xiaomei Wei, Ying Hu, Yang Lin, Ningfen Li, Cuihong Lu, Chengqiang Wei, Jiaying Long, ES09200 (GXMG)	Gaoqiaobacun, Enshi, Hubei. October-20 2019	XXXXXXXXXX	BGI T7	curcucrass
Asparagales	Hypoxidaceae	Molineria gracilis Kurz	Xiaomei Wei, Ying Hu, Yang Lin, Ningfen Li, Cuihong Lu, Chengqiang Wei, Jiaying Long, SC08649 (GXMG)	Emei Mountain, Emei City, Sichuan. September-5 2019	XXXXXXXXXX	BGI T7	curcugraci
Asparagales	Hypoxidaceae	Curculigo sp. 1KP	Not checked	Not checked	ERR3487379	Illumina HiSeq 2000	curcu379
Asparagales	Hypoxidaceae	Hypoxis hemerocallidea Fisch., C.A.Mey. & Avé-Lall.	Not checked	Not checked	SRR11881493	Illumina HiSeq 2000	hypoxhemer
Asparagales	Hypoxidaceae	Molineria capitulata (Lour.) Herb	Ying Hu, Xiaomei Wei, Meiqiong Tang, YY00135 (GXMG)	Guangxi Botanical Garden of Medicinal Plants, Nanning, Guangxi. May-24 2018	XXXXXXXXXX	BGI T7	molincapit
Asparagales	Hypoxidaceae	Molineria capitulata (Lour.) Herb	Not checked	Not checked	SRR11867410	Illumina HiSeq 2500	molincapitncbi41
Asparagales	Hypoxidaceae	*Molineria latifolia (Dryand. ex W.T.Aiton) Herb. ex Kurz	Not checked	Not checked	SRR11867409	Illumina HiSeq 2500	molinlatif
Asparagales	Iridaceae	Iris domestica (L.) Goldblatt & Mabb.	Ying Hu, Xiaomei Wei, Xiongbiao Xu, Renjun Mao, Zhiyuan Wei, CQ00883 (GXMG)	Chongqing Research Institute of Drug Planting, Sanquan, Nanchuan, Chongqing. November-3 2018	XXXXXXXXXX	BGI T7	belamchine883
Asparagales	Iridaceae	Iris domestica (L.) Goldblatt & Mabb.	Ying Hu, Xiaomei Wei, Meiqiong Tang, YY00176 (GXMG)	Guangxi Botanical Garden of Medicinal Plants, Nanning, Guangxi. May-28 2018	XXXXXXXXXX	BGI T7	belamchine176
Asparagales	Iridaceae	Iris domestica (L.) Goldblatt & Mabb.	Xiaomei Wei, Zhu Qiao, Yang Lin, Yanfen Huang, XA00155 (GXMG)	Xian Botanical Garden, Xian, Shaanxi. August-29 2018	XXXXXXXXXX	BGI T7	belamchine155
Asparagales	Iridaceae	*Crocosmia x crocosmiiflora	Ying Hu, Xiaomei Wei, Xiongbiao Xu, Renjun Mao, Zhiyuan Wei, CQ00670 (GXMG)	Chongqing Research Institute of Drug Planting, Sanquan, Nanchuan, Chongqing. November-2 2018	XXXXXXXXXX	BGI T7	crococroco
Asparagales	Iridaceae	Crocus ancyrensis (Herb.) Maw	Not checked	Not checked	SRR8284573	Illumina HiSeq 2000	crocuancyr
Asparagales	Iridaceae	Crocus chrysanthus (Herb.) Herb.	Not checked	Not checked	SRR23190670	Illumina NovaSeq 6000	crocuchrys
Asparagales	Iridaceae	Crocus flavus subsp. dissectus T.Baytop & B.Mathew	Not checked	Not checked	SRR23190669	Illumina NovaSeq 6000	crocuflavu
Asparagales	Iridaceae	Crocus graveolens Boiss. & Reut.	Not checked	Not checked	SRR23190668	Illumina NovaSeq 6000	crocugrave
Asparagales	Iridaceae	Crocus korolkowii Maw & Regel	Not checked	Not checked	SRR23190667	Illumina NovaSeq 6000	crocukorol
Asparagales	Iridaceae	Crocus sativus L.	Not checked	Not checked	SRR17272569	Illumina HiSeq 2500	crocusativ
Asparagales	Iridaceae	Crocus sublimis Herb.	Not checked	Not checked	SRR6162831	Illumina HiSeq 2000	crocusiebe
Asparagales	Iridaceae	Freesia refracta (Jacq.) Klatt	Ying Hu, Xiaomei Wei, Xiongbiao Xu, Renjun Mao, Zhiyuan Wei, CQ00678 (GXMG)	Chongqing Research Institute of Drug Planting, Sanquan, Nanchuan, Chongqing. November-2 2018	XXXXXXXXXX	BGI T7	freesrefra
Asparagales	Iridaceae	Iris atropurpurea Baker	Not checked	Not checked	SRR8110079	Illumina HiSeq 2500	irisatrop
Asparagales	Iridaceae	Iris bulleyana Dykes	Not checked	Not checked	SRR13065860	Illumina NovaSeq 6000	irisbulle
Asparagales	Iridaceae	Iris confusa Sealy	Ying Hu, Xiaomei Wei, Xiongbiao Xu, Renjun Mao, Zhiyuan Wei, CQ00759 (GXMG)	Chongqing Research Institute of Drug Planting, Sanquan, Nanchuan, Chongqing. November-2 2018	XXXXXXXXXX	BGI T7	irisconfu
Asparagales	Iridaceae	Iris dichotoma Pall.	Ying Hu, Xiaomei Wei, Yang Lin, BJ12592 (GXMG)	Dafutuo, Badaling, Yanqing, Beijing. June-2 2021	XXXXXXXXXX	BGI T7	irisdicho592
Asparagales	Iridaceae	Iris dichotoma Pall.	Ying Hu, Xiongbiao Xu, Zhiyuan Wei, HH00998 (GXMG)	The Botanical Garden in Hohhot, Inner Mongolia. September-17 2018	XXXXXXXXXX	BGI T7	irisdich998
Asparagales	Iridaceae	Iris dichotoma Pall.	Ying Hu, Xiongbiao Xu, Zhiyuan Wei, SY00779 (GXMG)	Shenyang Institute of Applied Ecology, Chinese Academy of Sciences, Shenhe, Shenyang, Liaoning. September-11 2018	XXXXXXXXXX	BGI T7	irisdichot779
Asparagales	Iridaceae	Iris domestica (L.) Goldblatt & Mabb	Not checked	Not checked	SRR10743030	Illumina NovaSeq 6000	irisdomes
Asparagales	Iridaceae	Iris ensata Thunb.	Ying Hu, Xiaomei Wei, Danfeng Tang, Changqian Quan, Cuihong Lu, Ningfeng Li, JJ10536 (GXMG)	Lushan, Jiujiang, Jiangxi. June-4 2020	XXXXXXXXXX	BGI T7	irisensat536
Asparagales	Iridaceae	Iris ensata Thunb.	Ying Hu, Xiongbiao Xu, Zhiyuan Wei, CC00442 (GXMG)	Jilin Agricultural University Pharmaceutical Botanical Garden, Changchun, Jilin. September-7 2018	XXXXXXXXXX	BGI T7	irisensat442
Asparagales	Iridaceae	Iris ensata Thunb.	Xiaomei Wei, Zhu Qiao, Yang Lin, Yanfen Huang, XA00307 (GXMG)	Xian Botanical Garden, Xian, Shaanxi. August-31 2018	XXXXXXXXXX	BGI T7	irisensa307
Asparagales	Iridaceae	Iris fulva Ker Gawl.	Not checked	Not checked	SRR531308	454 GS FLX Titanium	irisfulva
Asparagales	Iridaceae	*Iris germanica L.	Not checked	Not checked	SRR12009555	Illumina HiSeq 2000	irisgerma
Asparagales	Iridaceae	Iris halophila Pall.	Not checked	Not checked	SRR4343320	Illumina HiSeq 2500	irishalopncbi320
Asparagales	Iridaceae	Iris halophila Pall.	Ying Hu, Xiongbiao Xu, Zhiyuan Wei, CC00373 (GXMG)	Jilin Agricultural University Pharmaceutical Botanical Garden, Changchun, Jilin. September-7 2018	XXXXXXXXXX	BGI T7	irishalop
Asparagales	Iridaceae	Iris japonica Thunb.	Ying Hu, Xiaomei Wei, Meiqiong Tang, YY00141 (GXMG)	Guangxi Botanical Garden of Medicinal Plants, Nanning, Guangxi. May-24 2018	XXXXXXXXXX	BGI T7	irisjapon141
Asparagales	Iridaceae	Iris japonica Thunb.	Ying Hu, Xiaomei Wei, Xiongbiao Xu, Renjun Mao, Zhiyuan Wei, EM00047 (GXMG)	Longdong, Huangwan, Emei Mountain, Sichuan. October-21 2018	XXXXXXXXXX	BGI T7	irisjapon47
Asparagales	Iridaceae	Iris japonica Thunb.	Xiaomei Wei, Zhu Qiao, Yang Lin, Yanfen Huang, XA00337 (GXMG)	Xian Botanical Garden, Xian, Shaanxi. August-31 2018	XXXXXXXXXX	BGI T7	irisjapon337
Asparagales	Iridaceae	Iris lactea Pall.	Ying Hu, Xiongbiao Xu, Zhiyuan Wei, CC00666 (GXMG)	Changchun University of Chinese Medicine Seven stars hundred grass garden, Changchun, Jilin. September-11 2018	XXXXXXXXXX	BGI T7	irislacte666cz
Asparagales	Iridaceae	Iris lactea Pall.	Xiaomei Wei, Zhu Qiao, Yang Lin, Yanfen Huang, XA00273 (GXMG)	Xian Botanical Garden, Xian, Shaanxi. August-30 2018	XXXXXXXXXX	BGI T7	irislact273cz
Asparagales	Iridaceae	Iris lactea Pall.	Not checked	Not checked	SRR11586487	Illumina HiSeq 2000	irislactncbi487
Asparagales	Iridaceae	Iris lactea Pall.	Not checked	Not checked	SRR13586157	Illumina HiSeq 2000	irislactevar
Asparagales	Iridaceae	Iris laevigata Fisch.	Xiaomei Wei, Ying Hu, Yang Lin, Ningfen Li, Cuihong Lu, Chengqiang Wei, Jiaying Long, ES09749 (GXMG)	Gaoqiaobacun, Enshi, Hubei. October-24 2019	XXXXXXXXXX	BGI T7	irislaevi
Asparagales	Iridaceae	Iris macrosiphon Torr.	Not checked	Not checked	SRR10799653	NextSeq 500	irismacro
Asparagales	Iridaceae	Iris pseudacorus L.	Xiaomei Wei, Yang Lin, Ningfen Li, Xueyang Hu, NJ11226 (GXMG)	Nanjing Zhongshan Botanical Garden, Nannjing, Jiangsu. August-29 2020	XXXXXXXXXX	BGI T7	irispseud226
Asparagales	Iridaceae	Iris ruthenica Ker Gawl.	Ying Hu, Xiaomei Wei, Yang Lin, BJ12617 (GXMG)	Dafutuo, Badaling, Yanqing, Beijing. June-2 2021	XXXXXXXXXX	BGI T7	irisruthe
Asparagales	Iridaceae	Iris sp.	Ying Hu, Xiongbiao Xu, Zhiyuan Wei, CC00436 (GXMG)	Jilin Agricultural University Pharmaceutical Botanical Garden, Changchun, Jilin. September-7 2018	XXXXXXXXXX	BGI T7	irida436
Asparagales	Iridaceae	Iris speculatrix Hance	Xiaomei Wei, Ying Hu, Yang Lin, Ningfen Li, Cuihong Lu, Chengqiang Wei, Jiaying Long, ES09278 (GXMG)	Gaoqiaobacun, Enshi, Hubei. October-20 2019	XXXXXXXXXX	BGI T7	irisspecu
Asparagales	Iridaceae	Iris tectorum Maxim.	Ying Hu, Xiaomei Wei, Xiongbiao Xu, Renjun Mao, Zhiyuan Wei, CQ00840 (GXMG)	Chongqing Research Institute of Drug Planting, Sanquan, Nanchuan, Chongqing. November-3 2018	XXXXXXXXXX	BGI T7	iristecto
Asparagales	Iridaceae	Iris tigridia Bunge ex Ledeb.	Ying Hu, Xiaomei Wei, Yang Lin, BJ12620 (GXMG)	Dafutuo, Badaling, Yanqing, Beijing. June-2 2021	XXXXXXXXXX	BGI T7	iristigri
Asparagales	Iridaceae	Iris typhifolia Kitag	Ying Hu, Xiongbiao Xu, Zhiyuan Wei, CC00488 (GXMG)	Changchun University of Chinese Medicine Seven stars hundred grass garden, Changchun, Jilin. September-8 2018	XXXXXXXXXX	BGI T7	iristyphi
Asparagales	Iridaceae	Iris ventricosa Pall.	Ying Hu, Xiongbiao Xu, Zhiyuan Wei, SY00784 (GXMG)	Shenyang Institute of Applied Ecology, Chinese Academy of Sciences, Shenhe, Shenyang, Liaoning. September-11 2018	XXXXXXXXXX	BGI T7	irisventr
Asparagales	Iridaceae	Iris wattii Baker ex Hook.f.	Xiaomei Wei, Ying Hu, Yang Lin, Ningfen Li, Cuihong Lu, Chengqiang Wei, Jiaying Long, GY08064 (GXMG)	Guiyang Pharmaceutical Botanical Garden, Guiyang, Guizhou. August-24 2019	XXXXXXXXXX	BGI T7	iriswatti
Asparagales	Iridaceae	Iris wilsonii C.H.Wright	Ying Hu, Xiaomei Wei, Xiongbiao Xu, Renjun Mao, Zhiyuan Wei, CQ00615 (GXMG)	Chongqing Research Institute of Drug Planting, Sanquan, Nanchuan, Chongqing. November-2 2018	XXXXXXXXXX	BGI T7	iriswilso
Asparagales	Iridaceae	Sisyrinchium angustifolium Mill.	Not checked	Not checked	ERR2040737	Illumina HiSeq 2000	sisyrangus
Asparagales	Iridaceae	Sisyrinchium rosulatum E.P.Bicknell	Ying Hu, Xiaomei Wei, Danfeng Tang, Changqian Quan, Cuihong Lu, Ningfeng Li, JJ10793 (GXMG)	Poyang Lake Botanical Garden, Jiujiang, Jiangxi. June-11 2020	XXXXXXXXXX	BGI T7	sisyrrosul
Asparagales	Iridaceae	Trimezia martinicensis (Jacq.) Herb.	Xiaomei Wei, Ying Hu, Yang Lin, Ningfen Li, Cuihong Lu, Xueyang Hu, Jinhua Zhang, Chunlan Jiang, XH01133 (GXMG)	Xianhu Botanical Garden, Shenzhen, Guangdong. July-8 2019	XXXXXXXXXX	BGI T7	trimemarti
Asparagales	Ixioliriaceae	Ixiolirion sp. SU-2017	Not checked	Not checked	SRR6127590	Illumina HiSeq 2000	lxiol
Asparagales	Lanariaceae	Lanaria lanata (L.) T.Durand & Schinz	Not checked	Not checked	SRR6127591	Illumina HiSeq 2000	lanarlanat
Asparagales	Orchidaceae	Acampe rigida (Buch.-Ham. ex Sm.) P.F.Hunt	Ying Hu, Xiaomei Wei, Xiongbiao Xu, Renjun Mao, Zhiyuan Wei, BN01472 (GXMG)	Yunnan Branch of Institute of Medicinal Plants, CACMS, Jinghong, Yunnan. November-11 2018	XXXXXXXXXX	BGI T7	acamprigid
Asparagales	Orchidaceae	Odontochilus elwesii C.B.Clarke ex Hook.f	Xiaomei Wei, Ying Hu, Yang Lin, Ningfen Li, Cuihong Lu, Chengqiang Wei, Jiaying Long, ES09563 (GXMG)	Gaoqiaobacun, Enshi, Hubei. October-22 2019	XXXXXXXXXX	BGI T7	anoecelwes
Asparagales	Orchidaceae	Anoectochilus emeiensis K.Y.Lang	Not checked	Not checked	SRR8138703	Illumina HiSeq 2000	anoecemeie
Asparagales	Orchidaceae	Anoectochilus roxburghii (Wall.) Lindl.	Not checked	Not checked	SRR2962491	Illumina HiSeq 4000	anoecroxbu
Asparagales	Orchidaceae	Apostasia wallichii R.Br.	Not checked	Not checked	SRR6127586	Illumina HiSeq 2000	apostnippo
Asparagales	Orchidaceae	Apostasia odorata Blume	Not checked	Not checked	SRR1873735	Illumina HiSeq 2000	apostodora
Asparagales	Orchidaceae	Apostasia shenzhenica Z.J.Liu & L.J.Chen	Not checked	Not checked	Genome assembly ASM278626v1, accessed from https://www.ncbi.nlm.nih.gov/datasets/genome/GCA_002786265.1/	Illumina HiSeq 2000	apostshenz678
Asparagales	Orchidaceae	Apostasia wallichii R.Br.	Not checked	Not checked	SRR4343844	Illumina HiSeq 2500	apostwalli
Asparagales	Orchidaceae	Appendicula cornuta Blume	Xiaomei Wei, Ying Hu, Yang Lin, Ningfen Li, Cuihong Lu, Xueyang Hu, Jinhua Zhang, Chunlan Jiang, XH01218 (GXMG)	Xianhu Botanical Garden, Shenzhen, Guangdong. July-9 2019	XXXXXXXXXX	BGI T7	appencornu
Asparagales	Orchidaceae	Arundina graminifolia (D.Don) Hochr.	Ying Hu, Xiaomei Wei, Xiongbiao Xu, Renjun Mao, Zhiyuan Wei, BN01234 (GXMG)	Yunnan Branch of Institute of Medicinal Plants, CACMS, Jinghong, Yunnan. November-10 2018	XXXXXXXXXX	BGI T7	arundgrami
Asparagales	Orchidaceae	Bletilla ochracea Schltr.	Xiaomei Wei, Ying Hu, Yang Lin, Ningfen Li, Cuihong Lu, Chengqiang Wei, Jiaying Long, GY08022 (GXMG)	Guiyang Pharmaceutical Botanical Garden, Guiyang, Guizhou. August-23 2019	XXXXXXXXXX	BGI T7	bletiochra0822
Asparagales	Orchidaceae	Bletilla ochracea Schltr.	Xiaomei Wei, Ying Hu, Yang Lin, Ningfen Li, Cuihong Lu, Chengqiang Wei, Jiaying Long, ES09569 (GXMG)	Gaoqiaobacun, Enshi, Hubei. October-22 2019	XXXXXXXXXX	BGI T7	bletiochra569
Asparagales	Orchidaceae	Bletilla striata (Thunb.) Rchb.f.	Ying Hu, Xiongbiao Xu, Zhiyuan Wei, SY00914 (GXMG)	Pharmaceutical Botanical Garden of Shenyang Pharmaceutical University, Shenyang, Liaoning. September-13 2018	XXXXXXXXXX	BGI T7	bletistria
Asparagales	Orchidaceae	Bletilla striata (Thunb.) Rchb.f.	Xiaomei Wei, Zhu Qiao, Yang Lin, Yanfen Huang, XA00247 (GXMG)	Xian Botanical Garden, Xian, Shaanxi. August-30 2018	XXXXXXXXXX	BGI T7	bletilstri
Asparagales	Orchidaceae	Bulbophyllum kwangtungense Schltr.	Xiaomei Wei, Ying Hu, Yang Lin, Ningfen Li, Cuihong Lu, Xueyang Hu, Jinhua Zhang, Chunlan Jiang, XH01189 (GXMG)	Xianhu Botanical Garden, Shenzhen, Guangdong. July-9 2019	XXXXXXXXXX	BGI T7	bulbokwang
Asparagales	Orchidaceae	Caladenia actensis D.L.Jones & M.A.Clem.	Not checked	Not checked	SRR12619952	NextSeq 500	caladacten
Asparagales	Orchidaceae	Caladenia attingens Hopper & A.P.Br.	Not checked	Not checked	SRR12619953	NextSeq 500	caladattin
Asparagales	Orchidaceae	Caladenia crebra A.S.George	Not checked	Not checked	SRR12619954	NextSeq 500	caladcrebr
Asparagales	Orchidaceae	Caladenia denticulata Lindl.	Not checked	Not checked	SRR12619955	NextSeq 500	caladdenti
Asparagales	Orchidaceae	Caladenia longicauda Lindl.	Not checked	Not checked	SRR12619950	NextSeq 500	caladlongi
Asparagales	Orchidaceae	Caladenia plicata Fitzg.	Not checked	Not checked	SRR5487526	Illumina HiSeq 2500	caladplica
Asparagales	Orchidaceae	Calanthe furcata var. alismatifolia (Lindl.) M. Hiroe(unresolved name)	Xiaomei Wei, Ying Hu, Yang Lin, Ningfen Li, Cuihong Lu, Xueyang Hu, Jinhua Zhang, Chunlan Jiang, XH01211 (GXMG)	Xianhu Botanical Garden, Shenzhen, Guangdong. July-9 2019	XXXXXXXXXX	BGI T7	calanalism
Asparagales	Orchidaceae	Calanthe argenteostriata C.Z.Tang & S.J.Cheng	Xiaomei Wei, Ying Hu, Yang Lin, Ningfen Li, Cuihong Lu, Xueyang Hu, Jinhua Zhang, Chunlan Jiang, XH00886 (GXMG)	Xianhu Botanical Garden, Shenzhen, Guangdong. July-5 2019	XXXXXXXXXX	BGI T7	calanargen
Asparagales	Orchidaceae	Calanthe brevicornu Lindl.	Xiaomei Wei, Ying Hu, Yang Lin, Ningfen Li, Cuihong Lu, Chengqiang Wei, Jiaying Long, ES09565 (GXMG)	Gaoqiaobacun, Enshi, Hubei. October-22 2019	XXXXXXXXXX	BGI T7	calanbrevi
Asparagales	Orchidaceae	Calanthe clavata Lindl.	Xiaomei Wei, Ying Hu, Yang Lin, Ningfen Li, Cuihong Lu, Chengqiang Wei, Jiaying Long, ES09545 (GXMG)	Gaoqiaobacun, Enshi, Hubei. October-22 2019	XXXXXXXXXX	BGI T7	calanclava
Asparagales	Orchidaceae	Calanthe davidii Franch.	Ying Hu, Xiaomei Wei, Xiongbiao Xu, Renjun Mao, Zhiyuan Wei, CQ00651 (GXMG)	Chongqing Research Institute of Drug Planting, Sanquan, Nanchuan, Chongqing. November-2 2018	XXXXXXXXXX	BGI T7	calandavid
Asparagales	Orchidaceae	Calanthe flava (Blume) C.Morren	Not checked	Not checked	SRR13150668	Illumina HiSeq 2500	phaiuflavu
Asparagales	Orchidaceae	Calanthe graciliflora Hayata	Xiaomei Wei, Ying Hu, Yang Lin, Ningfen Li, Cuihong Lu, Chengqiang Wei, Jiaying Long, ES09566 (GXMG)	Gaoqiaobacun, Enshi, Hubei. October-22 2019	XXXXXXXXXX	BGI T7	calangraci
Asparagales	Orchidaceae	Calanthe hoshii S.Kobay.	Not checked	Not checked	DRR172090	Illumina HiSeq 2500	calanhoshii
Asparagales	Orchidaceae	Calanthe sieboldii Decne. ex Regel	Xiaomei Wei, Ying Hu, Yang Lin, Ningfen Li, Cuihong Lu, Chengqiang Wei, Jiaying Long, ES09564 (GXMG)	Gaoqiaobacun, Enshi, Hubei. October-22 2019	XXXXXXXXXX	BGI T7	calansiebo
Asparagales	Orchidaceae	Calanthe sp.	Not checked	Not checked	SRR5478843	Illumina HiSeq 4000	calan843
Asparagales	Orchidaceae	Calanthe sylvatica (Thouars) Lindl.	Xiaomei Wei, Ying Hu, Yang Lin, Ningfen Li, Cuihong Lu, Xueyang Hu, Jinhua Zhang, Chunlan Jiang, XH01212 (GXMG)	Xianhu Botanical Garden, Shenzhen, Guangdong, July-9 2019	XXXXXXXXXX	BGI T7	calansylva
Asparagales	Orchidaceae	Calanthe triplicata (Willemet) Ames	Ying Hu, Xiaomei Wei, Xiongbiao Xu, Renjun Mao, Zhiyuan Wei, BN01469 (GXMG)	Yunnan Branch of Institute of Medicinal Plants, Chinese Academy of Sciences, Jinghong, Yunnan. November-11 2018	XXXXXXXXXX	BGI T7	calantripl
Asparagales	Orchidaceae	Calanthe tsoongiana Tang & F.T.Wang	Ying Hu, Yang Lin, Changqian Quan, Ningfen Li, SX11107 (GXMG)	Taibai, Mei County, Shaanxi. July-21 2020	XXXXXXXXXX	BGI T7	calantsoon
Asparagales	Orchidaceae	Caleana major R.Br.	Not checked	Not checked	SRR12619946	NextSeq 500	caleamajor
Asparagales	Orchidaceae	Callostylis rigida Blume	Xiaomei Wei, Ying Hu, Yang Lin, Ningfen Li, Cuihong Lu, Xueyang Hu, Jinhua Zhang, Chunlan Jiang, XH01219 (GXMG)	Xianhu Botanical Garden, Shenzhen, Guangdong. July-9 2019	XXXXXXXXXX	BGI T7	callorigid
Asparagales	Orchidaceae	Cephalanthera damasonium (Mill.) Druce	Not checked	Not checked	SRR7030600	NextSeq 500	cephadamas
Asparagales	Orchidaceae	Ceratostylis subulata Blume	Xiaomei Wei, Ying Hu, Yang Lin, Ningfen Li, Cuihong Lu, Chengqiang Wei, Jiaying Long, ES09534 (GXMG)	Gaoqiaobacun, Enshi, Hubei. October-22 2019	XXXXXXXXXX	BGI T7	ceratsubul
Asparagales	Orchidaceae	Chiloglottis seminuda D.L.Jones	Not checked	Not checked	SRR7694030	Illumina HiSeq 2500	chilosemin
Asparagales	Orchidaceae	Chiloglottis trapeziformis Fitzg	Not checked	Not checked	SRR5690568	Illumina HiSeq 2500	chilotrape
Asparagales	Orchidaceae	Chiloglottis valida D.L.Jones	Not checked	Not checked	SRR12619948	NextSeq 500	chilovalid
Asparagales	Orchidaceae	Coelogyne barbata Lindl. ex Griff.	Xiaomei Wei, Ying Hu, Yang Lin, Ningfen Li, Cuihong Lu, Chengqiang Wei, Jiaying Long, ES09548 (GXMG)	Gaoqiaobacun, Enshi, Hubei. October-22 2019	XXXXXXXXXX	BGI T7	coelobarba
Asparagales	Orchidaceae	Coelogyne calcicola Kerr	Xiaomei Wei, Ying Hu, Yang Lin, Ningfen Li, Cuihong Lu, Xueyang Hu, Jinhua Zhang, Chunlan Jiang, XH00901 (GXMG)	Xianhu Botanical Garden, Shenzhen, Guangdong. July-5 2019	XXXXXXXXXX	BGI T7	coelocalci
Asparagales	Orchidaceae	Pholidota chinensis Lindl	Not checked	Not checked	SRR19440821	Illumina HiSeq 2000	coelochine
Asparagales	Orchidaceae	Coelogyne corymbosa Lindl.	Xiaomei Wei, Ying Hu, Yang Lin, Ningfen Li, Cuihong Lu, Chengqiang Wei, Jiaying Long, ES09550 (GXMG)	Gaoqiaobacun, Enshi, Hubei. October-22 2019	XXXXXXXXXX	BGI T7	coelocorym
Asparagales	Orchidaceae	Coelogyne flaccida Lindl.	Ying Hu, Xiaomei Wei, Xiongbiao Xu, Renjun Mao, Zhiyuan Wei, BN01471 (GXMG)	Yunnan Branch of Institute of Medicinal Plants, Chinese Academy of Sciences, Jinghong, Yunnan. November-11 2018	XXXXXXXXXX	BGI T7	coeloflacc
Asparagales	Orchidaceae	Coelogyne prolifera Lindl.	Xiaomei Wei, Ying Hu, Yang Lin, Ningfen Li, Cuihong Lu, Chengqiang Wei, Jiaying Long, ES09541 (GXMG)	Gaoqiaobacun, Enshi, Hubei. October-22 2019	XXXXXXXXXX	BGI T7	coeloproli
Asparagales	Orchidaceae	Coelogyne punctulata Lindl.	Xiaomei Wei, Ying Hu, Yang Lin, Ningfen Li, Cuihong Lu, Chengqiang Wei, Jiaying Long, ES09533 (GXMG)	Gaoqiaobacun, Enshi, Hubei. October-22 2019	XXXXXXXXXX	BGI T7	coelopunct
Asparagales	Orchidaceae	Corallorhiza striata Lindl.	Not checked	Not checked	SRR15368600	NextSeq 500	coralstria
Asparagales	Orchidaceae	Corybas aconitiflorus Salisb.	Not checked	Not checked	SRR12619957	NextSeq 500	corybaconi
Asparagales	Orchidaceae	Cremastra appendiculata (D.Don) Makino	Not checked	Not checked	CNGBdb CNA0050867	Illumina HiSeq 2000	cremaappen867
Asparagales	Orchidaceae	Crepidium acuminatum (D.Don) Szlach.	Not checked	Not checked	SRR19427097	Illumina NovaSeq 6000	crepiacumi
Asparagales	Orchidaceae	Cryptostylis leptochila F.Muell. ex Benth.	Not checked	Not checked	SRR12619943	NextSeq 500	cryptlepto
Asparagales	Orchidaceae	Cymbidium atropurpureum (Lindl.) Rolfe	Not checked	Not checked	SRR2976606	Illumina HiSeq 2000	cymbiatrop
Asparagales	Orchidaceae	Cymbidium aloifolium (L.) Sw.	Xiaomei Wei, Ying Hu, Yang Lin, Ningfen Li, Cuihong Lu, Xueyang Hu, Jinhua Zhang, Chunlan Jiang, XH00884 (GXMG)	Xianhu Botanical Garden, Shenzhen, Guangdong. July-5 2019	XXXXXXXXXX	BGI T7	cymbialoif
Asparagales	Orchidaceae	Cymbidium cyperifolium Wall. ex Lindl.	Xiaomei Wei, Ying Hu, Yang Lin, Ningfen Li, Cuihong Lu, Chengqiang Wei, Jiaying Long, ES09542 (GXMG)	Gaoqiaobacun, Enshi, Hubei. October-22 2019	XXXXXXXXXX	BGI T7	cymbicyper
Asparagales	Orchidaceae	Cymbidium dayanum Rchb.f.	Not checked	Not checked	SRR13674025	Illumina NovaSeq 6000	cymbidayan
Asparagales	Orchidaceae	Cymbidium ensifolium (L.) Sw.	Not checked	Not checked	Accession no. GWHBCII00000000, accessed from https://ngdc.cncb.ac.cn/gwh/Assembly/20686/show	BGI T7	cymbiensif5355
Asparagales	Orchidaceae	Cymbidium faberi Rolfe	Xiaomei Wei, Ying Hu, Yang Lin, Ningfen Li, Cuihong Lu, Xueyang Hu, Jinhua Zhang, Chunlan Jiang, XH01195 (GXMG)	Xianhu Botanical Garden, Shenzhen, Guangdong. July-9 2019	XXXXXXXXXX	BGI T7	cymbifaber
Asparagales	Orchidaceae	Cymbidium floribundum Lindl.	Not checked	Not checked	SRR13674023	Illumina NovaSeq 6000	cymbiflori
Asparagales	Orchidaceae	Cymbidium goeringii (Rchb.f.) Rchb.f.	Not checked	Not checked	SRR10829551	Illumina HiSeq 2500	cymbigoerincbi551
Asparagales	Orchidaceae	Cymbidium hookerianum Rchb.f.	Xiaomei Wei, Ying Hu, Yang Lin, Ningfen Li, Cuihong Lu, Chengqiang Wei, Jiaying Long, ES09562 (GXMG)	Gaoqiaobacun, Enshi, Hubei. October-22 2019	XXXXXXXXXX	BGI T7	cymbihooke
Asparagales	Orchidaceae	Cymbidium kanran Makino	Not checked	Not checked	SRR15058104	Illumina HiSeq 2500	cymbikanra
Asparagales	Orchidaceae	Cymbidium lancifolium Hook.	Not checked	Not checked	SRR13674027	Illumina NovaSeq 6000	cymbilanci
Asparagales	Orchidaceae	Cymbidium tortisepalum var. longibracteatum (Y.S.Wu & S.C.Chen) S.C.Chen & Z.J.Liu	Not checked	Not checked	SRR3591803	Illumina HiSeq 2000	cymbilongi
Asparagales	Orchidaceae	Cymbidium lowianum (Rchb.f.) Rchb.f.	Not checked	Not checked	SRR13674032	Illumina NovaSeq 6000	cymbilowia
Asparagales	Orchidaceae	Cymbidium macrorhizon Lindl.	Not checked	Not checked	SRR10829546	llumina HiSeq 2500	cymbimacro
Asparagales	Orchidaceae	Cymbidium maguanense F.Y.Liu	Xiaomei Wei, Ying Hu, Yang Lin, Ningfen Li, Cuihong Lu, Xueyang Hu, Jinhua Zhang, Chunlan Jiang, XH00906 (GXMG)	Xianhu Botanical Garden, Shenzhen, Guangdong. July-5 2019	XXXXXXXXXX	BGI T7	cymbimagua
Asparagales	Orchidaceae	Cymbidium mannii Rchb.f.	Not checked	Not checked	SRR2976385	Illumina HiSeq 2000	cymbimanni
Asparagales	Orchidaceae	Cymbidium sinense (Jacks.) Willd.	Ying Hu, Xiaomei Wei, Xiongbiao Xu, Renjun Mao, Zhiyuan Wei, BN01467 (GXMG)	Yunnan Branch of Institute of Medicinal Plants, Chinese Academy of Sciences, Jinghong, Yunnan. November-10 2018	XXXXXXXXXX	BGI T7	cymbisinen
Asparagales	Orchidaceae	Cymbidium sp.	Not checked	Not checked	SRR13069641	Illumina NovaSeq 6000	cymbi641
Asparagales	Orchidaceae	Cymbidium longibracteaturn Y.S.Wu & S.C.Chen	Not checked	Not checked	SRR7164788	Illumina HiSeq 2500	cymbid788
Asparagales	Orchidaceae	Cymbidium tortisepalum Fukuy.	Not checked	Not checked	SRR13674029	Illumina NovaSeq 6000	cymbitorti
Asparagales	Orchidaceae	Cymbidium tracyanum L.Castle	Xiaomei Wei, Ying Hu, Yang Lin, Ningfen Li, Cuihong Lu, Chengqiang Wei, Jiaying Long, ES09519 (GXMG)	Gaoqiaobacun, Enshi, Hubei. October-22 2019	XXXXXXXXXX	BGI T7	cymbitracy
Asparagales	Orchidaceae	Cypripedium acaule Aiton	Not checked	Not checked	SRR6127587	Illumina HiSeq 2000	cypriacaul
Asparagales	Orchidaceae	Cypripedium bardolphianum W.W.Sm. & Farrer	Not checked	Not checked	SRR7466536	Illumina HiSeq 2000	cypribardo
Asparagales	Orchidaceae	Cypripedium fargesii Franch.	Not checked	Not checked	SRR7466546	Illumina HiSeq 2000	cyprifarge
Asparagales	Orchidaceae	Cypripedium flavum P.F.Hunt & Summerh.	Not checked	Not checked	SRR7466540	Illumina HiSeq 2000	cyprifalvu
Asparagales	Orchidaceae	Cypripedium formosanum Hayata	Not checked	Not checked	SRR4343831	Illumina HiSeq 2500	cyprifolmo
Asparagales	Orchidaceae	Cypripedium lentiginosum P.J.Cribb & S.C.Chen	Not checked	Not checked	SRR7466533	Illumina HiSeq 2000	cyprilenti
Asparagales	Orchidaceae	Cypripedium macranthos Sw.	Not checked	Not checked	DRR451069	Illumina HiSeq 2000	cyprimacra
Asparagales	Orchidaceae	Cypripedium margaritaceum Franch.	Not checked	Not checked	SRR5722148	Illumina HiSeq 2000	cyprimarga
Asparagales	Orchidaceae	Cypripedium micranthum Franch.	Not checked	Not checked	SRR7466537	Illumina HiSeq 2000	cyprimicra
Asparagales	Orchidaceae	Cypripedium sichuanense Perner	Not checked	Not checked	SRR7466543	Illumina HiSeq 2000	cyprisichu
Asparagales	Orchidaceae	Cypripedium singchii Z.J.Liu & L.J.Chen	Not checked	Not checked	SRR7466545	Illumina HiSeq 2000	cyprisingc
Asparagales	Orchidaceae	Dactylorhiza fuchsii (Druce) Soó	Not checked	Not checked	SRR3330395	Illumina HiSeq 2500	dactyfuchs
Asparagales	Orchidaceae	Dactylorhiza incarnata (L.) Soó	Not checked	Not checked	SRR3330399	Illumina Genome Analyzer II	dactyincar
Asparagales	Orchidaceae	Dactylorhiza viridis (L.) R.M.Bateman, Pridgeon & M.W.Chase	Ying Hu, Yang Lin, Changqian Quan, Ningfen Li, SX11075 (GXMG)	Taibai, Mei County, Shaanxi. July-20 2020	XXXXXXXXXX	BGI T7	dactyvirid
Asparagales	Orchidaceae	Dendrobium denneanum Kerr	Xiaomei Wei, Ying Hu, Yang Lin, Ningfen Li, Cuihong Lu, Xueyang Hu, Jinhua Zhang, Chunlan Jiang, XH00898 (GXMG)	Xianhu Botanical Garden, Shenzhen, Guangdong. July-5 2019	XXXXXXXXXX	BGI T7	dendrauran
Asparagales	Orchidaceae	Dendrobium moniliforme (L.) Sw.	Not checked	Not checked	SRR13577106	Illumina HiSeq 4000	dendrcandi
Asparagales	Orchidaceae	Dendrobium catenatum Lindl.	Not checked	Not checked	Genome assembly ASM160598v2, accessed from https://www.ncbi.nlm.nih.gov/datasets/genome/GCF_001605985.2/	Illumina HiSeq 2500	dendrcaten598
Asparagales	Orchidaceae	Dendrobium chrysanthum Wall. ex Lindl.	Xiaomei Wei, Ying Hu, Yang Lin, Ningfen Li, Cuihong Lu, Xueyang Hu, Jinhua Zhang, Chunlan Jiang, XH00897 (GXMG)	Xianhu Botanical Garden, Shenzhen, Guangdong. July-5 2019	XXXXXXXXXX	BGI T7	dendrchrysa
Asparagales	Orchidaceae	Dendrobium chrysotoxum Lindl.	Not checked	Not checked	Genome assembly ASM1992579v1, accessed from https://ngdc.cncb.ac.cn/gwh/ncbi_assembly/56717/show	BGI T7	dendrchrys4445
Asparagales	Orchidaceae	Dendrobium christyanum Rchb.f.	Xiaomei Wei, Ying Hu, Yang Lin, Ningfen Li, Cuihong Lu, Xueyang Hu, Jinhua Zhang, Chunlan Jiang, XH01202 (GXMG)	Xianhu Botanical Garden, Shenzhen, Guangdong. July-9 2019	XXXXXXXXXX	BGI T7	dendrchris1202
Asparagales	Orchidaceae	Dendrobium fimbriatum Hook.	Ying Hu, Xiaomei Wei, Xiongbiao Xu, Renjun Mao, Zhiyuan Wei, BN01470 (GXMG)	Yunnan Branch of Institute of Medicinal Plants, Chinese Academy of Sciences, Jinghong, Yunnan. November-11 2018	XXXXXXXXXX	BGI T7	dendrfimbr
Asparagales	Orchidaceae	Dendrobium catenatum Lindl.	Not checked	Not checked	SRR12066380	Illumina HiSeq 4000	dendrhuosh
Asparagales	Orchidaceae	Dendrobium leptocladum Hayata	Xiaomei Wei, Ying Hu, Yang Lin, Ningfen Li, Cuihong Lu, Xueyang Hu, Jinhua Zhang, Chunlan Jiang, XH01200 (GXMG)	Xianhu Botanical Garden, Shenzhen, Guangdong. July-9 2019	XXXXXXXXXX	BGI T7	dendrlepto
Asparagales	Orchidaceae	Dendrobium linawianum Rchb.f.	Xiaomei Wei, Ying Hu, Yang Lin, Ningfen Li, Cuihong Lu, Xueyang Hu, Jinhua Zhang, Chunlan Jiang, XH01201 (GXMG)	Xianhu Botanical Garden, Shenzhen, Guangdong. July-9 2019	XXXXXXXXXX	BGI T7	dendrlina
Asparagales	Orchidaceae	Dendrobium lituiflorum Lindl.	Xiaomei Wei, Ying Hu, Yang Lin, Ningfen Li, Cuihong Lu, Xueyang Hu, Jinhua Zhang, Chunlan Jiang, XH00900 (GXMG)	Xianhu Botanical Garden, Shenzhen, Guangdong. July-5 2019	XXXXXXXXXX	BGI T7	dendrlitui
Asparagales	Orchidaceae	Dendrobium loddigesii Rolfe	Not checked	Not checked	SRR15562445	Illumina NovaSeq 6000	dendrloddi
Asparagales	Orchidaceae	Dendrobium lohohense Tang & F.T.Wang	Xiaomei Wei, Ying Hu, Yang Lin, Ningfen Li, Cuihong Lu, Xueyang Hu, Jinhua Zhang, Chunlan Jiang, XH01184 (GXMG)	Xianhu Botanical Garden, Shenzhen, Guangdong. July-9 2019	XXXXXXXXXX	BGI T7	dendrlohoh
Asparagales	Orchidaceae	Dendrobium longicornu Lindl.	Not checked	Not checked	SRR5190198	Illumina HiSeq 2000	dendrlongi
Asparagales	Orchidaceae	Dendrobium moniliforme (L.) Sw.	Not checked	Not checked	SRR6964413	Illumina HiSeq 4000	dendrmonil
Asparagales	Orchidaceae	Dendrobium moschatum (Buch.-Ham.) Sw.	Ying Hu, Xiaomei Wei, Xiongbiao Xu, Renjun Mao, Zhiyuan Wei, BN01475 (GXMG)	Yunnan Branch of Institute of Medicinal Plants, Chinese Academy of Sciences, Jinghong, Yunnan. November-11 2018	XXXXXXXXXX	BGI T7	dendrmosch
Asparagales	Orchidaceae	Dendrobium nobile Lindl.	Not checked	Not checked	Genome assembly Dnobile, accessed from https://www.ncbi.nlm.nih.gov/datasets/genome/GCA_022539455.1/	BGI T7	dendrnobil550
Asparagales	Orchidaceae	Dendrobium catenatum Lindl.	Not checked	Not checked	SRR7339995	Illumina HiSeq 4000	dendroffic
Asparagales	Orchidaceae	Dendrobium palpebrae Lindl.	Not checked	Not checked	SRR6127588	Illumina HiSeq 2000	dendrpalpe
Asparagales	Orchidaceae	Dendrobium scoriarum W.W.Sm.	Xiaomei Wei, Ying Hu, Yang Lin, Ningfen Li, Cuihong Lu, Chengqiang Wei, Jiaying Long, ES09571 (GXMG)	Gaoqiaobacun, Enshi, Hubei. October-22 2019	XXXXXXXXXX	BGI T7	dendrscori
Asparagales	Orchidaceae	Dendrobium sinense Tang & F.T.Wang	Not checked	Not checked	SRR15112265	Illumina HiSeq 2000	dendrsinen
Asparagales	Orchidaceae	Dendrobium spatella Rchb.f.	Xiaomei Wei, Ying Hu, Yang Lin, Ningfen Li, Cuihong Lu, Xueyang Hu, Jinhua Zhang, Chunlan Jiang, XH01292 (GXMG)	Xianhu Botanical Garden, Shenzhen, Guangdong. July-9 2019	XXXXXXXXXX	BGI T7	dendrspate
Asparagales	Orchidaceae	Dendrobium sp.	Not checked	Not checked	SRR10197558	BGISEQ-500	dendr558
Asparagales	Orchidaceae	Dendrobium terminale E.C.Parish & Rchb.f.	Not checked	Not checked	SRR2967016	Illumina HiSeq 2000	dendrtermi
Asparagales	Orchidaceae	Dendrobium wardianum R.Warner	Xiaomei Wei, Ying Hu, Yang Lin, Ningfen Li, Cuihong Lu, Xueyang Hu, Jinhua Zhang, Chunlan Jiang, XH01199 (GXMG)	Xianhu Botanical Garden, Shenzhen, Guangdong. July-9 2019	XXXXXXXXXX	BGI T7	dendrwardi
Asparagales	Orchidaceae	Dendrobium williamsonii Day & Rchb.f.	Ying Hu, Xiaomei Wei, Meiqiong Tang, YY00801 (GXMG)	Guangxi Botanical Garden of Medicinal Plants, Nanning, Guangxi. July-3 2018	XXXXXXXXXX	BGI T7	dendrwilli
Asparagales	Orchidaceae	Dienia ophrydis (J.Koenig) Seidenf.	Xiaomei Wei, Ying Hu, Yang Lin, Ningfen Li, Cuihong Lu, Xueyang Hu, Jinhua Zhang, Chunlan Jiang, XH01222 (GXMG)	Xianhu Botanical Garden, Shenzhen, Guangdong. July-9 2019	XXXXXXXXXX	BGI T7	dieniophry
Asparagales	Orchidaceae	Diuris orientis D.L.Jones	Not checked	Not checked	SRR12619956	NextSeq 500	diuriorien
Asparagales	Orchidaceae	Drakaea elastica Lindl.	Not checked	Not checked	ERR2040742	Illumina HiSeq 2000	drakaelast
Asparagales	Orchidaceae	Drakaea thynniphila A.S.George	Not checked	Not checked	SRR12619958	NextSeq 500	drakathynn
Asparagales	Orchidaceae	Epidendrum fulgens Brongn.	Not checked	Not checked	SRR13069832	Illumina NovaSeq 6000	epidefulge
Asparagales	Orchidaceae	Epidendrum puniceoluteum F.Pinheiro & F.Barros	Not checked	Not checked	SRR13069815	Illumina NovaSeq 6000	epidepunic
Asparagales	Orchidaceae	Dendrobium fuscescens Griff	Xiaomei Wei, Ying Hu, Yang Lin, Ningfen Li, Cuihong Lu, Chengqiang Wei, Jiaying Long, ES09532 (GXMG)	Gaoqiaobacun, Enshi, Hubei. October-22 2019	XXXXXXXXXX	BGI T7	epigefusce
Asparagales	Orchidaceae	Epipactis helleborine (L.) Crantz	Ying Hu, Yang Lin, Changqian Quan, Ningfen Li, SX10995 (GXMG)	Taibai, Mei County, Shaanxi. July-17 2020	XXXXXXXXXX	BGI T7	epipahelle
Asparagales	Orchidaceae	Epipactis helleborine (L.) Crantz	Not checked	Not checked	DRR054697	Illumina HiSeq 1500	epipahellencbi697
Asparagales	Orchidaceae	Epipactis purpurata Sm.	Not checked	Not checked	SRR7030605	NextSeq 500	epipapurpu
Asparagales	Orchidaceae	Epipactis sp.	Ying Hu, Xiaomei Wei, Yang Lin, SX12818 (GXMG)	Taibai Mountain, Mei County, Shaanxi. June-10 2021	XXXXXXXXXX	BGI T7	epipac12818
Asparagales	Orchidaceae	Epipactis sp.	Ying Hu, Xiaomei Wei, XueYang Hu, Yude Peng, SC13062 (GXMG)	Shade town to Yajiang Road Kangding, Sichuan. August-1 2021	XXXXXXXXXX	BGI T7	epipa61
Asparagales	Orchidaceae	Epipogium aphyllum Sw.	Not checked	Not checked	SRR6008328	Illumina HiSeq 2000	epipoaphyl
Asparagales	Orchidaceae	Epipogium roseum (D.Don) Lindl.	Not checked	Not checked	SRR6008326	Illumina HiSeq 2000	epiporoseu
Asparagales	Orchidaceae	Callostylis bambusifolia (Lindl.) S.C.Chen & J.J.Wood	Xiaomei Wei, Ying Hu, Yang Lin, Ningfen Li, Cuihong Lu, Chengqiang Wei, Jiaying Long, ES09543 (GXMG)	Gaoqiaobacun, Enshi, Hubei. October-22 2019	XXXXXXXXXX	BGI T7	eriabambu
Asparagales	Orchidaceae	Eria clausa King & Pantl.	Xiaomei Wei, Ying Hu, Yang Lin, Ningfen Li, Cuihong Lu, Xueyang Hu, Jinhua Zhang, Chunlan Jiang, XH01217 (GXMG)	Xianhu Botanical Garden, Shenzhen, Guangdong. July-9 2019	XXXXXXXXXX	BGI T7	eriaclaus
Asparagales	Orchidaceae	Eria scabrilinguis Lindl.	Xiaomei Wei, Ying Hu, Yang Lin, Ningfen Li, Cuihong Lu, Xueyang Hu, Jinhua Zhang, Chunlan Jiang, XH01216 (GXMG)	Xianhu Botanical Garden, Shenzhen, Guangdong. July-9 2019	XXXXXXXXXX	BGI T7	eriacorne
Asparagales	Orchidaceae	Eria coronaria (Lindl.) Rchb.f.	Xiaomei Wei, Ying Hu, Yang Lin, Ningfen Li, Cuihong Lu, Xueyang Hu, Jinhua Zhang, Chunlan Jiang, XH01198 (GXMG)	Xianhu Botanical Garden, Shenzhen, Guangdong. July-9 2019	XXXXXXXXXX	BGI T7	eriacoron
Asparagales	Orchidaceae	Eria gagnepainii A.D.Hawkes & A.H.Heller	Xiaomei Wei, Ying Hu, Yang Lin, Ningfen Li, Cuihong Lu, Xueyang Hu, Jinhua Zhang, Chunlan Jiang, XH01220 (GXMG)	Xianhu Botanical Garden, Shenzhen, Guangdong. July-9 2019	XXXXXXXXXX	BGI T7	eriagagne
Asparagales	Orchidaceae	Pinalia graminifolia (Lindl.) Kuntze	Xiaomei Wei, Ying Hu, Yang Lin, Ningfen Li, Cuihong Lu, Chengqiang Wei, Jiaying Long, ES09553 (GXMG)	Gaoqiaobacun, Enshi, Hubei. October-22 2019	XXXXXXXXXX	BGI T7	eriagrami
Asparagales	Orchidaceae	Eria marginata Rolfe	Xiaomei Wei, Ying Hu, Yang Lin, Ningfen Li, Cuihong Lu, Chengqiang Wei, Jiaying Long, ES09554 (GXMG)	Gaoqiaobacun, Enshi, Hubei. October-22 2019	XXXXXXXXXX	BGI T7	eriamargi
Asparagales	Orchidaceae	Conchidium rhomboidale (Tang & F.T.Wang) S.C.Chen & J.J.Wood	Xiaomei Wei, Ying Hu, Yang Lin, Ningfen Li, Cuihong Lu, Chengqiang Wei, Jiaying Long, ES09539 (GXMG)	Gaoqiaobacun, Enshi, Hubei. October-22 2019	XXXXXXXXXX	BGI T7	eriarhomb
Asparagales	Orchidaceae	Eria carinata Gibson	Xiaomei Wei, Ying Hu, Yang Lin, Ningfen Li, Cuihong Lu, Xueyang Hu, Jinhua Zhang, Chunlan Jiang, XH00902 (GXMG)	Xianhu Botanical Garden, Shenzhen, Guangdong. July-5 2019	XXXXXXXXXX	BGI T7	eriarosea
Asparagales	Orchidaceae	Erycina crista-galli (Rchb.f.) N.H.Williams & M.W.Chase	Not checked	Not checked	SRR7650034	NextSeq 500	erycicrist
Asparagales	Orchidaceae	Erycina pusilla (L.) N.H.Williams & M.W.Chase	Not checked	Not checked	SRR5012151	Illumina HiSeq 2000	erycipusil
Asparagales	Orchidaceae	Eulophia herbacea Lindl.	Xiaomei Wei, Ying Hu, Yang Lin, Ningfen Li, Cuihong Lu, Chengqiang Wei, Jiaying Long, ES09529 (GXMG)	Gaoqiaobacun, Enshi, Hubei. October-22 2019	XXXXXXXXXX	BGI T7	eulopherba
Asparagales	Orchidaceae	Galeola faberi Rolfe	Not checked	Not checked	SRR5722169	Illumina HiSeq 2000	galeofaber
Asparagales	Orchidaceae	Galeola lindleyana (Hook.f. & Thomson) Rchb.f.	Not checked	Not checked	SRR21707786	Illumina NovaSeq 6000	galeolindl
Asparagales	Orchidaceae	Gastrodia elata Blume	Not checked	Not checked	SRR18147620	Illumina NovaSeq 6000	gastrelata
Asparagales	Orchidaceae	Gastrodia elata Blume	Not checked	Not checked	SRR19144006	Illumina HiSeq 2000	gastroelata
Asparagales	Orchidaceae	Gastrodia fontinalis T.P.Lin	Not checked	Not checked	DRR261774	NextSeq 500	gastrfonti
Asparagales	Orchidaceae	*Gastrodia kuroshimensis Suetsugu	Not checked	Not checked	DRR261755	NextSeq 500	gastrkuros
Asparagales	Orchidaceae	Gastrodia nipponica (Honda) Tuyama	Not checked	Not checked	DRR261788	NextSeq 500	gastrnippo
Asparagales	Orchidaceae	Gastrodia pubilabiata Sawa	Not checked	Not checked	SRR3990693	Illumina HiSeq 2500	gastrpubil
Asparagales	Orchidaceae	*Gastrodia takeshimensis Suetsugu	Not checked	Not checked	DRR261764	NextSeq 500	gastrtakes
Asparagales	Orchidaceae	Goodyera biflora (Lindl.) Hook.f.	Ying Hu, Xiaomei Wei, Yang Lin, SX12755 (GXMG)	Taibai Mountain, Mei County, Shaanxi. June-8 2021	XXXXXXXXXX	BGI T7	goodybiflo
Asparagales	Orchidaceae	Goodyera foliosa (Lindl.) Benth. ex C.B.Clarke	Xiaomei Wei, Ying Hu, Yang Lin, Ningfen Li, Cuihong Lu, Chengqiang Wei, Jiaying Long, ES09497 (GXMG)	Gaoqiaobacun, Enshi, Hubei. October-22 2019	XXXXXXXXXX	BGI T7	goodyfolio
Asparagales	Orchidaceae	Goodyera fumata Thwaites	Not checked	Not checked	SRR1867375	llumina MiSeq	goodyfumat
Asparagales	Orchidaceae	Goodyera pubescens (Willd.) R.Br.	Not checked	Not checked	ERR2040739	Illumina HiSeq 2000	goodypubes
Asparagales	Orchidaceae	Goodyera schlechtendaliana Rchb.f.	Ying Hu, Xiaomei Wei, Danfeng Tang, Changqian Quan, Cuihong Lu, Ningfeng Li, JJ10646 (GXMG)	Lushan, Jiujiang, Jiangxi. June-6 2020	XXXXXXXXXX	BGI T7	goodyschle
Asparagales	Orchidaceae	Grammatophyllum speciosum Blume	Xiaomei Wei, Ying Hu, Yang Lin, Ningfen Li, Cuihong Lu, Xueyang Hu, Jinhua Zhang, Chunlan Jiang, XH01179 (GXMG)	Xianhu Botanical Garden, Shenzhen, Guangdong. July-9 2019	XXXXXXXXXX	BGI T7	grammspeci
Asparagales	Orchidaceae	Gymnadenia conopsea (L.) R.Br.	Not checked	Not checked	SRR8175724	Illumina HiSeq 2500	gymnaconop
Asparagales	Orchidaceae	Gymnadenia odoratissima (L.) Rich.	Not checked	Not checked	SRR8175672	Illumina HiSeq 2500	gymnaodora
Asparagales	Orchidaceae	Gymnadenia orchidis Lindl.	Ying Hu, Xiaomei Wei, XueYang Hu, Yude Peng, SC13041 (GXMG)	Zheduo Mountain, Kanding, Sichuan. July-31 2021	XXXXXXXXXX	BGI T7	gymnaorchi41cz
Asparagales	Orchidaceae	Gymnadenia rhellicani (Teppner & E.Klein) Teppner & E.Klein	Not checked	Not checked	SRR8175670	Illumina HiSeq 2500	gymnarhell
Asparagales	Orchidaceae	Habenaria ciliolaris Kraenzl.	Xiaomei Wei, Ying Hu, Yang Lin, Ningfen Li, Cuihong Lu, Chengqiang Wei, Jiaying Long, GY08056 (GXMG)	Guiyang Pharmaceutical Botanical Garden, Guiyang, Guizhou. August-24 2019	XXXXXXXXXX	BGI T7	habencilio
Asparagales	Orchidaceae	Habenaria delavayi Finet	Not checked	Not checked	SRR5722143	Illumina HiSeq 2000	habendelav
Asparagales	Orchidaceae	Habenaria pantlingiana Kraenzl.	Not checked	Not checked	SRR1867575	Illumina MiSeq	habenpantl
Asparagales	Orchidaceae	Hemipilia forrestii Rolfe	Not checked	Not checked	SRR5722142	Illumina HiSeq 2000	hemipforre
Asparagales	Orchidaceae	Herminium monorchis (L.) R.Br.	Ying Hu, Xiaomei Wei, XueYang Hu, Yude Peng, SC13109 (GXMG)	Xindu Bridge, KangDing, Sichuan. August-3 2021	XXXXXXXXXX	BGI T7	hermimonor
Asparagales	Orchidaceae	Holcoglossum flavescens (Schltr.) Z.H.Tsi	Xiaomei Wei, Ying Hu, Yang Lin, Ningfen Li, Cuihong Lu, Xueyang Hu, Jinhua Zhang, Chunlan Jiang, XH01182 (GXMG)	Xianhu Botanical Garden, Shenzhen, Guangdong. July-9 2019	XXXXXXXXXX	BGI T7	holcoflave
Asparagales	Orchidaceae	Lecanorchis nigricans Honda	Not checked	Not checked	SRR5722166	Illumina HiSeq 2000	lecannigri
Asparagales	Orchidaceae	Leochilus labiatus (Sw.) Kuntze	Not checked	Not checked	SRR19179837	Illumina HiSeq 2000	leochlabia
Asparagales	Orchidaceae	Limodorum abortivum (L.) Sw.	Not checked	Not checked	SRR12850909	Illumina HiSeq 2500	limodabort
Asparagales	Orchidaceae	Liparis chapaensis Gagnep	Xiaomei Wei, Ying Hu, Yang Lin, Ningfen Li, Cuihong Lu, Chengqiang Wei, Jiaying Long, ES09570 (GXMG)	Gaoqiaobacun, Enshi, Hubei. October-22 2019	XXXXXXXXXX	BGI T7	liparchapa
Asparagales	Orchidaceae	Liparis fargesii Finet	Xiaomei Wei, Ying Hu, Yang Lin, Ningfen Li, Cuihong Lu, Chengqiang Wei, Jiaying Long, ES09560 (GXMG)	Gaoqiaobacun, Enshi, Hubei. October-22 2019	XXXXXXXXXX	BGI T7	liparfarge
Asparagales	Orchidaceae	Liparis glossula Rchb.f.	Xiaomei Wei, Ying Hu, Yang Lin, Ningfen Li, Cuihong Lu, Chengqiang Wei, Jiaying Long, ES09540 (GXMG)	Gaoqiaobacun, Enshi, Hubei. October-22 2019	XXXXXXXXXX	BGI T7	lipargloss
Asparagales	Orchidaceae	Liparis nervosa (Thunb.) Lindl.	Ying Hu, Xiaomei Wei, Xiongbiao Xu, Renjun Mao, Zhiyuan Wei, CQ00775 (GXMG)	Chongqing Research Institute of Drug Planting, Sanquan, Nanchuan, Chongqing. November-2 2018	XXXXXXXXXX	BGI T7	liparnervo
Asparagales	Orchidaceae	Liparis regnieri Finet	Xiaomei Wei, Ying Hu, Yang Lin, Ningfen Li, Cuihong Lu, Chengqiang Wei, Jiaying Long, ES09490 (GXMG)	Gaoqiaobacun, Enshi, Hubei. October-22 2019	XXXXXXXXXX	BGI T7	liparregni
Asparagales	Orchidaceae	Liparis viridiflora (Blume) Lindl	Ying Hu, Xiaomei Wei, Xiongbiao Xu, Renjun Mao, Zhiyuan Wei, BN01501 (GXMG)	Yunnan Branch of Institute of Medicinal Plants, CACMS, Jinghong, Yunnan. November-11 2018	XXXXXXXXXX	BGI T7	liparvirid
Asparagales	Orchidaceae	Ludisia discolor (Ker Gawl.) A.Rich.	Not checked	Not checked	ERR2040744	Illumina HiSeq 2000	ludisdisco
Asparagales	Orchidaceae	Luisia magniflora Z.H.Tsi & S.C.Chen	Xiaomei Wei, Ying Hu, Yang Lin, Ningfen Li, Cuihong Lu, Xueyang Hu, Jinhua Zhang, Chunlan Jiang, XH01227 (GXMG)	Xianhu Botanical Garden, Shenzhen, Guangdong. July-9 2019	XXXXXXXXXX	BGI T7	luisimagni
Asparagales	Orchidaceae	Luisia morsei Rolfe	Xiaomei Wei, Ying Hu, Yang Lin, Ningfen Li, Cuihong Lu, Xueyang Hu, Jinhua Zhang, Chunlan Jiang, XH01194 (GXMG)	Xianhu Botanical Garden, Shenzhen, Guangdong. July-9 2019	XXXXXXXXXX	BGI T7	luisimorse
Asparagales	Orchidaceae	Masdevallia picturata Rchb.f.	Not checked	Not checked	SRR1867576	Illumina MiSeq	masdepictu
Asparagales	Orchidaceae	Masdevallia yungasensis T.Hashim.	Not checked	Not checked	ERR3487380	Illumina HiSeq 2000	masdeyunga
Asparagales	Orchidaceae	Mexipedium xerophyticum (Soto Arenas, Salazar & Hágsater) V.A.Albert & M.W.Chase	Not checked	Not checked	SRR6127592	Illumina HiSeq 2000	mexipxerop
Asparagales	Orchidaceae	Microtis unifolia (G.Forst.) Rchb.f	Not checked	Not checked	SRR12619942	NextSeq 500	microparvi
Asparagales	Orchidaceae	Neottia nidus-avis (L.) Rich.	Not checked	Not checked	SRR11805803	NextSeq 500	neottnidus
Asparagales	Orchidaceae	Neottianthe cucullata (L.) Schltr.	Ying Hu, Xiaomei Wei, XueYang Hu, Yude Peng, XZ13273 (GXMG)	Gangyun Mountain, Zhamu, Bomi, Tibet. August-12 2021	XXXXXXXXXX	BGI T7	neottcucul
Asparagales	Orchidaceae	*Neuwiedia malipoensis Z.J.Liu, L.J.Chen & K.Wei Liu	Not checked	Not checked	SRR5722159	Illumina HiSeq 2000	neuwimalip
Asparagales	Orchidaceae	Neuwiedia zollingeri Rchb.f.	Not checked	Not checked	SRR4343851	Illumina HiSeq 2500	neuwizolli
Asparagales	Orchidaceae	Oberonia cavaleriei Finet	Xiaomei Wei, Ying Hu, Yang Lin, Ningfen Li, Cuihong Lu, Chengqiang Wei, Jiaying Long, ES09572 (GXMG)	Gaoqiaobacun, Enshi, Hubei. October-22 2020	XXXXXXXXXX	BGI T7	oberocaval52
Asparagales	Orchidaceae	Oberonia cavaleriei Finet	Xiaomei Wei, Ying Hu, Yang Lin, Ningfen Li, Cuihong Lu, Xueyang Hu, Jinhua Zhang, Chunlan Jiang, XH01213 (GXMG)	Xianhu Botanical Garden, Shenzhen, Guangdong. July-9 2019	XXXXXXXXXX	BGI T7	oberocaval1213
Asparagales	Orchidaceae	*Oberonia gammiei King & Pantl.	Xiaomei Wei, Ying Hu, Yang Lin, Ningfen Li, Cuihong Lu, Chengqiang Wei, Jiaying Long, ES09552 (GXMG)	Gaoqiaobacun, Enshi, Hubei. October-22 2020	XXXXXXXXXX	BGI T7	oberogammi
Asparagales	Orchidaceae	Oberonia pyrulifera Lindl.	Xiaomei Wei, Ying Hu, Yang Lin, Ningfen Li, Cuihong Lu, Chengqiang Wei, Jiaying Long, ES09561 (GXMG)	Gaoqiaobacun, Enshi, Hubei. October-22 2020	XXXXXXXXXX	BGI T7	oberopyrul
Asparagales	Orchidaceae	Odontochilus elwesii C.B.Clarke ex Hook.f.	Ying Hu, Xiaomei Wei, Yang Lin, SC12834 (GXMG)	Taibai Mountain, Mei County, Shaanxi. July-23 2021	XXXXXXXXXX	BGI T7	odontelwes
Asparagales	Orchidaceae	Oeceoclades maculata (Lindl.) Lindl.	Not checked	Not checked	SRR12403236	Illumina HiScanSQ	oeceomacul
Asparagales	Orchidaceae	Gomesa flexuosa (Lodd.) M.W.Chase & N.H.Williams	Xiaomei Wei, Ying Hu, Yang Lin, Ningfen Li, Cuihong Lu, Xueyang Hu, Jinhua Zhang, Chunlan Jiang, XH00964 (GXMG)	Xianhu Botanical Garden, Shenzhen, Guangdong. July-5 2019	XXXXXXXXXX	BGI T7	oncidflexu
Asparagales	Orchidaceae	Oncidium sp.	Not checked	Not checked	SRR11886173	Illumina HiSeq 4000	oncid173
Asparagales	Orchidaceae	Oncidium sphacelatum Lindl.	Not checked	Not checked	ERR2040743	Illumina HiSeq 2000	oncidsphac
Asparagales	Orchidaceae	Ophrys fusca subsp. iricolor (Desf.) K.Richt.	Not checked	Not checked	SRR10189295	Illumina HiSeq 2000	ophryfusca
Asparagales	Orchidaceae	Ophrys sphegodes subsp. passionis (Sennen) Sanz & Nuet	Not checked	Not checked	SRR10189318	Illumina HiSeq 2000	ophrygarga
Asparagales	Orchidaceae	Ophrys sphegodes subsp. atrata (Rchb.f.) A.Bolòs	Not checked	Not checked	SRR10189337	Illumina HiSeq 2000	ophryincub
Asparagales	Orchidaceae	Ophrys insectifera L.	Not checked	Not checked	SRR10189304	Illumina HiSeq 2000	ophryinsec
Asparagales	Orchidaceae	Ophrys fusca Link	Not checked	Not checked	SRR10189308	Illumina HiSeq 2000	ophrymesar
Asparagales	Orchidaceae	Ophrys sphegodes Mill.	Not checked	Not checked	SRR10189309	Illumina HiSeq 2000	ophryspheg
Asparagales	Orchidaceae	Dactylorhiza hatagirea (D.Don) Soó	Not checked	Not checked	SRR8863094	Illumina Genome Analyzer IIx	orchihatag
Asparagales	Orchidaceae	Orchis italica Poir.	Not checked	Not checked	SRR1238143	Illumina HiSeq 1500	orchiitali
Asparagales	Orchidaceae	Oreorchis fargesii Finet	Ying Hu, Xiaomei Wei, Yang Lin, SX12747 (GXMG)	Taibai Mountain, Mei County, Shaanxi. June-8 2021	XXXXXXXXXX	BGI T7	oreorfarge747
Asparagales	Orchidaceae	Oreorchis sp.	Ying Hu, Xiaomei Wei, Yang Lin, SX12764 (GXMG)	Taibai Mountain, Mei County, Shaanxi. June-8 2021	XXXXXXXXXX	BGI T7	oreorc12764
Asparagales	Orchidaceae	Paphiopedilum armeniacum S.C.Chen & F.Y.Liu	Not checked	Not checked	SRR9842188	Illumina HiSeq X Ten	paphiarmen
Asparagales	Orchidaceae	Paphiopedilum barbigerum Tang & F.T.Wang	Not checked	Not checked	SRR21010422	Illumina NovaSeq 6000	paphibarbi
Asparagales	Orchidaceae	Paphiopedilum callosum (Rchb.f.) Stein	Not checked	Not checked	SRR6127593	Illumina HiSeq 2000	paphicallo
Asparagales	Orchidaceae	Paphiopedilum concolor (Lindl. ex Bateman) Pfitzer	Not checked	Not checked	SRR1405687	Illumina HiSeq 2000	paphiconco
Asparagales	Orchidaceae	Paphiopedilum dianthum Tang & F.T.Wang	Xiaomei Wei, Ying Hu, Yang Lin, Ningfen Li, Cuihong Lu, Chengqiang Wei, Jiaying Long, ES09544 (GXMG)	Gaoqiaobacun, Enshi, Hubei. October-22 2020	XXXXXXXXXX	BGI T7	paphidiant
Asparagales	Orchidaceae	Paphiopedilum emersonii Koop. & P.J.Cribb	Ying Hu, Xiaomei Wei, Meiqiong Tang, YY00796 (GXMG)	Guangxi Botanical Garden of Medicinal Plants, Nanning, Guangxi. July-3 2018	XXXXXXXXXX	BGI T7	paphiemers
Asparagales	Orchidaceae	Paphiopedilum henryanum Braem	Not checked	Not checked	SRR6513336	Illumina HiSeq 2000	paphihenry
Asparagales	Orchidaceae	Paphiopedilum hirsutissimum (Lindl. ex Hook.) Stein	Ying Hu, Xiaomei Wei, Yang Lin, Ningfen Li, Cuihong Lu, Zhaoming Tan, Yongji Huang, Xueyang Hu, JX00793 (GXMG)	Xunma, Wuping, Jingxi, Guangxi. May-28,2019	XXXXXXXXXX	BGI T7	paphihirsu
Asparagales	Orchidaceae	Paphiopedilum malipoense S.C.Chen & Z.H.Tsi	Not checked	Not checked	SRR5722160	Illumina HiSeq 2000	paphimalip
Asparagales	Orchidaceae	Paphiopedilum parishii (Rchb.f.) Stein	Xiaomei Wei, Ying Hu, Yang Lin, Ningfen Li, Cuihong Lu, Xueyang Hu, Jinhua Zhang, Chunlan Jiang, XH01188 (GXMG)	Xianhu Botanical Garden, Shenzhen, Guangdong. July-9 2019	XXXXXXXXXX	BGI T7	paphiparis
Asparagales	Orchidaceae	Paphiopedilum sp.	Not checked	Not checked	SRR13330701	HiSeq X Ten	paphi701
Asparagales	Orchidaceae	Paphiopedilum spicerianum (Rchb.f.) Pfitzer	Not checked	Not checked	SRR14164238	HiSeq X Ten	paphispice
Asparagales	Orchidaceae	Papilionanthe sp.	Not checked	Not checked	SRR18095152	Illumina NovaSeq 6000	papil152
Asparagales	Orchidaceae	Papilionanthe teres (Roxb.) Schltr.	Xiaomei Wei, Ying Hu, Yang Lin, Ningfen Li, Cuihong Lu, Xueyang Hu, Jinhua Zhang, Chunlan Jiang, XH01226 (GXMG)	Xianhu Botanical Garden, Shenzhen, Guangdong. July-9 2019	XXXXXXXXXX	BGI T7	papilteres
Asparagales	Orchidaceae	Phaius columnaris C.Z.Tang & S.J.Cheng	Xiaomei Wei, Ying Hu, Yang Lin, Ningfen Li, Cuihong Lu, Xueyang Hu, Jinhua Zhang, Chunlan Jiang, XH01215 (GXMG)	Xianhu Botanical Garden, Shenzhen, Guangdong. July-9 2019	XXXXXXXXXX	BGI T7	phaiucolum
Asparagales	Orchidaceae	Phaius mishmensis (Lindl. & Paxton) Rchb.f.	Xiaomei Wei, Ying Hu, Yang Lin, Ningfen Li, Cuihong Lu, Xueyang Hu, Jinhua Zhang, Chunlan Jiang, XH00885 (GXMG)	Xianhu Botanical Garden, Shenzhen, Guangdong. July-5 2019	XXXXXXXXXX	BGI T7	phaiumishm
Asparagales	Orchidaceae	Phaius tankervilleae (Banks) Blume	Not checked	Not checked	SRR6986588	Illumina HiSeq 2000	phaiutanca
Asparagales	Orchidaceae	Phaius wallichii Lindl.	Ying Hu, Xiaomei Wei, XueYang Hu, Yude Peng, XZ13272 (GXMG)	Gangyun Mountain, Zhamu, Bomi, Tibet. August-12 2021	XXXXXXXXXX	BGI T7	phaiuwalli
Asparagales	Orchidaceae	Phalaenopsis amabilis (L.) Blume	Not checked	Not checked	SRR8082048	Illumina HiSeq 2000	phalaamabi
Asparagales	Orchidaceae	Phalaenopsis aphrodite Rchb.f.	Not checked	Not checked	SRR5075718	Illumina HiSeq 2500	phalaaphro718
Asparagales	Orchidaceae	Phalaenopsis aphrodite subsp. formosana Christenson	Not checked	Not checked	SRR2431793	Illumina Genome Analyzer II	phalaaphrod793
Asparagales	Orchidaceae	Phalaenopsis bellina (Rchb.f.) Christenson	Not checked	Not checked	SRR4343837	Illumina HiSeq 2500	phalabelli
Asparagales	Orchidaceae	Phalaenopsis celebensis H.R.Sweet	Not checked	Not checked	SRR8984583	Illumina HiSeq 4000	phalaceleb
Asparagales	Orchidaceae	Phalaenopsis cornu-cervi (Breda) Blume & Rchb.f.	Not checked	Not checked	SRR8984585	Illumina HiSeq 4000	phalacornu
Asparagales	Orchidaceae	Phalaenopsis equestris (Schauer) Rchb.f.	Not checked	Not checked	Genome assembly ASM126359v1, accessed from https://www.ncbi.nlm.nih.gov/datasets/genome/GCF_001263595.1/	Illumina HiSeq 2000	phalaeques198
Asparagales	Orchidaceae	Phalaenopsis fasciata Rchb.f.	Not checked	Not checked	SRR8984590	Illumina HiSeq 4000	phalafasci
Asparagales	Orchidaceae	Phalaenopsis javanica J.J.Sm.	Not checked	Not checked	SRR8984588	Illumina HiSeq 4000	phalajavan
Asparagales	Orchidaceae	Phalaenopsis lueddemanniana Rchb.f.	Not checked	Not checked	SRR4343828	Illumina HiSeq 2500	phalaluedd
Asparagales	Orchidaceae	Phalaenopsis modesta J.J.Sm.	Not checked	Not checked	SRR4343834	Illumina HiSeq 2500	phalamodes
Asparagales	Orchidaceae	Phalaenopsis schilleriana Rchb.f.	Not checked	Not checked	SRR4343822	Illumina HiSeq 2500	phalaschill
Asparagales	Orchidaceae	Phalaenopsis sp.	Not checked	Not checked	SRR6901075	Illumina HiSeq 4000	phala27
Asparagales	Orchidaceae	Phalaenopsis wilsonii Rolfe	Xiaomei Wei, Ying Hu, Yang Lin, Ningfen Li, Cuihong Lu, Chengqiang Wei, Jiaying Long, ES09549 (GXMG)	Gaoqiaobacun, Enshi, Hubei. October-22 2020	XXXXXXXXXX	BGI T7	phalawilso
Asparagales	Orchidaceae	Pholidota longipes S.C.Chen & Z.H.Tsi	Xiaomei Wei, Ying Hu, Yang Lin, Ningfen Li, Cuihong Lu, Chengqiang Wei, Jiaying Long, ES09491 (GXMG)	Gaoqiaobacun, Enshi, Hubei. October-22 2020	XXXXXXXXXX	BGI T7	pholilongi
Asparagales	Orchidaceae	Pholidota missionariorum Gagnep.	Xiaomei Wei, Ying Hu, Yang Lin, Ningfen Li, Cuihong Lu, Chengqiang Wei, Jiaying Long, ES09535 (GXMG)	Gaoqiaobacun, Enshi, Hubei. October-22 2020	XXXXXXXXXX	BGI T7	pholimissi
Asparagales	Orchidaceae	Phragmipedium lindleyanum (M.R.Schomb. ex Lindl.) Rolfe	Not checked	Not checked	SRR6127594	Illumina HiSeq 2000	phraglindl
Asparagales	Orchidaceae	Pinalia amica (Rchb.f.) Kuntze	Xiaomei Wei, Ying Hu, Yang Lin, Ningfen Li, Cuihong Lu, Xueyang Hu, Jinhua Zhang, Chunlan Jiang, XH01204 (GXMG)	Xianhu Botanical Garden, Shenzhen, Guangdong. July-9 2019	XXXXXXXXXX	BGI T7	pinalamica
Asparagales	Orchidaceae	Platanthera clavellata (Michx.) Luer	Not checked	Not checked	ERR2040740	Illumina HiSeq 2000	plataclave
Asparagales	Orchidaceae	*Platanthera guangdongensis Y.F.Li, L.F.Wu & L.J.Chen	Not checked	Not checked	SRR18919244	Illumina HiSeq 4000	plataguang
Asparagales	Orchidaceae	Platanthera sp.	Ying Hu, Xiaomei Wei, XueYang Hu, Yude Peng, SC12964 (GXMG)	Qingcheng Mountain, Dujiangyan, Sichuan. July-28 2021	XXXXXXXXXX	BGI T7	orchida
Asparagales	Orchidaceae	*Platanthera zijinensis Q.L.Ye, Z.M.Zhong & Ming H.Li	Not checked	Not checked	SRR18919251	Illumina HiSeq 4000	platazijin
Asparagales	Orchidaceae	Pterostylis curta R.Br.	Not checked	Not checked	SRR12619959	NextSeq 500	pterocurta
Asparagales	Orchidaceae	Renanthera coccinea Lour.	Ying Hu, Xiaomei Wei, Meiqiong Tang, YY00150 (GXMG)	Guangxi Botanical Garden of Medicinal Plants, Nanning, Guangxi. May-25 2018	XXXXXXXXXX	BGI T7	renancocci150
Asparagales	Orchidaceae	Renanthera coccinea Lour.	Ying Hu, Xiaomei Wei, Danfeng Tang, Changqian Quan, Cuihong Lu, Ningfeng Li, JJ10520 (GXMG)	Lushan, Jiujiang, Jiangxi. June-4 2020	XXXXXXXXXX	BGI T7	renancocci52cz
Asparagales	Orchidaceae	Rhynchostylis retusa (L.) Blume	Xiaomei Wei, Ying Hu, Yang Lin, Ningfen Li, Cuihong Lu, Xueyang Hu, Jinhua Zhang, Chunlan Jiang, XH01178 (GXMG)	Xianhu Botanical Garden, Shenzhen, Guangdong. July-9 2019	XXXXXXXXXX	BGI T7	rhyncretus
Asparagales	Orchidaceae	Rimacola elliptica (R.Br.) Rupp	Not checked	Not checked	SRR12619945	NextSeq 500	rimacellip
Asparagales	Orchidaceae	Sarcoglyphis smithiana (Kerr) Seidenf.	Xiaomei Wei, Ying Hu, Yang Lin, Ningfen Li, Cuihong Lu, Chengqiang Wei, Jiaying Long, ES09538 (GXMG)	Gaoqiaobacun, Enshi, Hubei. October-22 2019	XXXXXXXXXX	BGI T7	sarcosmith
Asparagales	Orchidaceae	Sedirea subparishii (Z.H.Tsi) Christenson	Xiaomei Wei, Ying Hu, Yang Lin, Ningfen Li, Cuihong Lu, Chengqiang Wei, Jiaying Long, ES09559 (GXMG)	Gaoqiaobacun, Enshi, Hubei. October-22 2019	XXXXXXXXXX	BGI T7	sedirsubpa
Asparagales	Orchidaceae	Selenipedium aequinoctiale Garay	Not checked	Not checked	SRR6127595	Illumina HiSeq 2000	selenaequi
Asparagales	Orchidaceae	Serapias vomeracea (Burm.f.) Briq.	Not checked	Not checked	SRR4244932	Illumina HiSeq 2500	serapvomer
Asparagales	Orchidaceae	Spathoglottis plicata Blume	Xiaomei Wei, Ying Hu, Ningfen Li, Xueyang Hu, Peng Li, GD12165 (GXMG)	The South China Botanical Garden, Guangzhou, Guangdong. November-19 2020	XXXXXXXXXX	BGI T7	spathplica12165
Asparagales	Orchidaceae	Spathoglottis plicata Blume	Xiaomei Wei, Ying Hu, Yang Lin, Ningfen Li, Cuihong Lu, Xueyang Hu, Jinhua Zhang, Chunlan Jiang, XH01214 (GXMG)	Xianhu Botanical Garden, Shenzhen, Guangdong. July-9 2019	XXXXXXXXXX	BGI T7	spathplica
Asparagales	Orchidaceae	Spiranthes sp.	Ying Hu, Xiaomei Wei, XueYang Hu, Yude Peng, SC13026 (GXMG)	Mugecuo, Luding, Sichuan. July-30 2021	XXXXXXXXXX	BGI T7	spira
Asparagales	Orchidaceae	Tainia hongkongensis Rolfe	Xiaomei Wei, Ying Hu, Ningfen Li, Xueyang Hu, Peng Li, GD12241 (GXMG)	Dinghushan Nature Reserve, Zhaoqing, Guangdong. November-23 2020	XXXXXXXXXX	BGI T7	tainihongk
Asparagales	Orchidaceae	Thelymitra angustifolia R.Br.	Not checked	Not checked	SRR12619944	NextSeq 500	thelyangus
Asparagales	Orchidaceae	Thunia alba (Lindl.) Rchb.f.	Xiaomei Wei, Ying Hu, Yang Lin, Ningfen Li, Cuihong Lu, Xueyang Hu, Jinhua Zhang, Chunlan Jiang, XH01206 (GXMG)	Xianhu Botanical Garden, Shenzhen, Guangdong. July-9 2019	XXXXXXXXXX	BGI T7	thunialba
Asparagales	Orchidaceae	Uncifera acuminata Lindl.	Xiaomei Wei, Ying Hu, Yang Lin, Ningfen Li, Cuihong Lu, Chengqiang Wei, Jiaying Long, ES09567 (GXMG)	Gaoqiaobacun, Enshi, Hubei. October-22 2020	XXXXXXXXXX	BGI T7	uncifacumi
Asparagales	Orchidaceae	Vanda coerulea Griff. ex Lindl.	Xiaomei Wei, Ying Hu, Yang Lin, Ningfen Li, Cuihong Lu, Xueyang Hu, Jinhua Zhang, Chunlan Jiang, XH00949 (GXMG)	Xianhu Botanical Garden, Shenzhen, Guangdong. July-5 2019	XXXXXXXXXX	BGI T7	vandacoeru
Asparagales	Orchidaceae	Vanda subconcolor Tang & F.T.Wang	Xiaomei Wei, Ying Hu, Yang Lin, Ningfen Li, Cuihong Lu, Chengqiang Wei, Jiaying Long, ES09547 (GXMG)	Gaoqiaobacun, Enshi, Hubei. October-22 2020	XXXXXXXXXX	BGI T7	vandasubco
Asparagales	Orchidaceae	Vandopsis gigantea (Lindl.) Pfitzer	Xiaomei Wei, Ying Hu, Yang Lin, Ningfen Li, Cuihong Lu, Xueyang Hu, Jinhua Zhang, Chunlan Jiang, XH00882 (GXMG)	Xianhu Botanical Garden, Shenzhen, Guangdong. July-5 2019	XXXXXXXXXX	BGI T7	vandogigan
Asparagales	Orchidaceae	Vandopsis undulata (Lindl.) J.J.Sm.	Xiaomei Wei, Ying Hu, Yang Lin, Ningfen Li, Cuihong Lu, Chengqiang Wei, Jiaying Long, ES09551 (GXMG)	Gaoqiaobacun, Enshi, Hubei. October-22 2020	XXXXXXXXXX	BGI T7	vandoundul
Asparagales	Orchidaceae	Vanilla planifolia Jacks. ex Andrews	Not checked	Not checked	Genome assembly Elo_Vpla-B_alternate_1.0 - NCBI - NLM, accessed from https://www.ncbi.nlm.nih.gov/datasets/genome/GCA_016413885.1/	Illumina HiSeq 2000	vanilplani740
Asparagales	Orchidaceae	Vanilla shenzhenica Z.J.Liu & S.C.Chen	Not checked	Not checked	SRR5722167	Illumina HiSeq 2000	vanilshenz
Asparagales	Tecophilaeaceae	Cyanastrum cordifolium Oliv.	Not checked	Not checked	ERR2040749	Illumina Genome Analyzer II	cyanacordi
Asparagales	Tecophilaeaceae	Cyanella orchidiformis Jacq.	Not checked	Not checked	ERR2040750	Illumina HiSeq 2000	cyaneorchi
Asparagales	Xeronemataceae	Xeronema callistemon W.R.B.Oliv.	Not checked	Not checked	ERR2040753	Illumina Genome Analyzer II	xeroncalli
Acorales	Acoraceae	Acorus calamus var. angustatus Besser	Not checked	Not checked	Genome assembly, accessed from https://ftp.cngb.org/pub/CNSA/data4/CNP0001708/CNS0456199/CNA0036157/CNSA, no. CNA0036157, accessed Jul. 2022	NA	acorutatar
Alismatales	Araceaeae	Pistia stratiotes L.	Not checked	Not checked	Genome assembly, accessed from https://ftp.cngb.org/pub/CNSA/data3/CNP0002271/CNS0457649/CNA0036302/, no. CNA0036302, accessed Nov 2021	NA	pstratiotes
Alismatales	Araceae	Spirodela polyrhiza (L.) Schleid.	Not checked	Not checked	Genome assembly, accessed from Phytozome V2 Spolyrhiza_290_v2. Accessed Dec 2019	NA	spolyrhiza290
Alismatales	Aponogetonaceae	Aponogeton lakhonensis A.Camus	Not checked	Not checked	SRR18139172	Illumina HiSeq 4000	aponcly19015
Alismatales	Hydrocharitaceae	Ottelia emersa Z.C.Zhao & R.L.Luo	Not checked	Not checked	SRR18139168	Illumina HiSeq 4000	ottes16001
Dioscoreales	Dioscoreaceae	Dioscorea alata L.	Not checked	Not checked	Dioscorea alata v2.1(Phytozome)	NA	dioscalata
Petrosaviales	Petrosaviaceae	Japonolirion osense Nakai	Not checked	Not checked	SRR19179853	Illumina HiSeq 2000	japonosens
Liliales	Philesiaceae	Philesia sp. NYBG	Not checked	Not checked	SRR21619436	Illumina HiSeq 2000	phile
Liliales	Philesiaceae	Lapageria sp. NYBG	Not checked	Not checked	SRR21589200	Illumina HiSeq 2000	lapag
GXMG = Herbarium of Guangxi Botanical Garden of Medicinal Plants.
Sequences generated in this study were marked as XXXXXXXXXX.
*Accepted names were checked according to the NCBI Taxonomy (https://www.ncbi.nlm.nih.gov/Taxonomy/Browser/wwwtax.cgi). Other species names were checked according to the World Flora Online (https://www.worldfloraonline.org/).

## Sheet: Table S2 Calilbr. points
Table S2-1. Calibration points used for divergence time estimation of Asparagales in this study.
Calibrated nodes	Calibrated ages (Ma)	References
	BEAST (Log Normal)
Crown of Yucca and Hesperaloe (Asparagaceae)	M:19.5, S:0.11, Offset:0	Iles et al. (2015)1; Givnish et al. (2016)2. A fossil of Protoyucca, very similar to Yucca, was reported in northwestern Nevada from the Middle Miocene. (Tidwell and Parker 1990)3.
Crown node of Dendrobium (Orchidaceae)	M:28, S:0.11, Offset:0	Iles et al. (2015)1. Fossil leaves of Early Miocene Dendrobium were reported from New Zealand (Conran et al. 2009)4.
Crown node of Phormium and Dianella	M:37.5, S:0.06, Offset:0	A macrofossil record of leaves belong to Phormium was reported at Newvale locality, late Oligocene (Lee et al. 2012)5. We refered to Givnish et al. (2016)2 and Iles et al. (2015)1.
Crown for Araceae	M:75.0, S:0.07, Offset:0	The oldest free-floating member of Araceae was reported from the Late Cretaceous of North America (Kvače 1995; Chen et al. 2022)6, 7.
Crown for core Alismatids	M:112.5, S:0.07, Offset:0	Fossils of Aponogeton harryi from the Late Cretaceous of Wyoming, USA and A. longispinosum from the early middle Eocene of British Columbia, Canada (Chen et al. 2022; Grímsson et al. 2014)7, 8.
Crown of Ripogonum, Lapageria, Philesia (Liliales)	M:61.0, S:0.05, Offset:0	Iles et al. (2015)1; Givnish et al. (2016)2; Fossil leaves of Ripogonum were reported from early Eocene estuarine mudstone deposit at Lowana Road in western Tasmania (Coran et al. 2009)4.
Crown for monocots	M:150.0, S:0.08, Offset:0	152 (134–174) Ma estimated from Eguchi et al. (2016)9. 153 (131–183) Ma estimated from Li et al. (2019)10. 132 (124–142) Ma estimated from Givnish et al. (2016)2
Table S2-2. Calibration points used for divergence time estimation of genes alliinase and LFS in this study.
Calibrated nodes	Min and max age used for calibration (Ma)	References
Crown of Allium	30.9–48.6	Estimated in this study.
Crown of Amaryllidaceae	58.5–84.3	Estimated in this study.
Crown for monocots	124.0–183.0	152 (134–174) Ma estimated from Eguchi et al. (2016)9; 153 (131–183) Ma estimated from Li et al. (2019)10; 132 (124–142) Ma estimated from Givnish et al. (2016)2.
Crown of Angiosperms	200.9–245.0	Angiosperm Phylogeny Group (Stevens et al. 2017)11.
Crown of fern + seed plants	396.4–420.7 MYA	TimeTree (Kumar et al. 2022)12.
Geologic time was referred to Walker et al. (2018).
Ma = million years.
References
1. Iles, W. J. D., Smith, S. Y., Gandolfo, M. A. & Graham, S. W. Monocot fossils suitable for molecular dating analyses. Bot. J. Linn. Soc. 178, 346–374 (2015).
2. Givnish, T. J. et al. Phylogenomics and historical biogeography of the monocot order Liliales: out of Australia and through Antarctica. Cladistics 32, 581–605 (2016).
3. Tidwell, W. D. & Parker, L. R. Protoyucca shadishii gen. et sp. nov., An arborescent monocotyledon with secondary growth from the Middle Miocene of Northwestern Nevada, U.S.A. Rev. Palaeobot. Palynol. 62, 79–95 (1990).
4. Conran, J. G., Bannister, J. M. & Lee, D. E. Earliest orchid macrofossils: Early Miocene Dendrobium and Earina (Orchidaceae: Epidendroideae) from New Zealand. Am. J. Bot. 96, 466–474 (2009).
5. Lee, D. E., Conran, J. G., Lindqvist, J. K., Bannister, J. M. & Mildenhall, D. C. New Zealand Eocene, Oligocene and Miocene macrofossil and pollen records and modern plant distributions in the Southern Hemisphere. Bot. Rev. 78, 235–260 (2012).
6. Kvaček, Z. Limnobiophyllum Krassilov - a fossil link between the Araceae and the Lemnaceae. Aquat. Bot. 50, 49–61 (1995).
7. Chen, L. Y. et al. Phylogenomic analyses of Alismatales shed light into adaptations to aquatic environments. Mol. Biol. Evol. 39, msac079 (2022).
8. Grímsson, F., Zetter, R., Halbritter, H. & Grimm, G. W. Aponogeton pollen from the Cretaceous and Paleogene of North America and West Greenland: Implications for the origin and palaeobiogeography of the genus. Rev. Palaeobot. Palynol. 200, 161–187 (2014).
9. Eguchi, S. & Tamura, M. N. Evolutionary timescale of monocots determined by the fossilized birth-death model using a large number of fossil records. Evolution 70, 1136–1144 (2016).
10. Li, H. T. et al. Origin of angiosperms and the puzzle of the Jurassic gap. Nat. Plants 5, 461–470 (2019).
11. Stevens, P. F. Angiosperm Phylogeny Website. Version 14, July 2017.
12. Kumar, S. et al. TimeTree 5: an expanded resource for species divergence times. Mol. Biol. Evol. 39, msac174 (2022).

## Sheet: Table S3 Estimated time
Table S3. Divergence time estimated in this study and previous studies.
Taxa	Stem node age (mean and 95%, Ma)	Crown node age (mean and 95%, Ma)	Crown node age estimated in previous studies
Asparagales	129.7 (105.9–151.5)	123.1 (99.2–143.8)	119 Ma (Janssen and Bremer 2004)1; 123 Ma (Givnish et al. 2018)2; 112 Ma (Hertweck et al. 2015)3; 133 Ma (Li et al. 2019)4.
Asparagaceae	77.6 (63.9–91.2)	73.1 (60.1–86.0)	75 Ma (Silvestro et al. 2021)5; 65.5 Ma (Ji et al. 2023)6.
Amaryllidaceae	77.6 (63.9–91.2)	71.8 (58.5–84.3)	87 Ma (Janssen and Bremer 2004)1; 51 or 33.7 Ma (Chen et al. 2013)7; 44.7 Ma (Han et al. 2020)8; 67.9 Ma (Costa et al. 2020)9.
Genus Allium	52.7 (42.0–99.6)	40.3 (30.9–48.6)	22.2 Ma (Xie et al. 2020)10.
Asphodelaceae	84.0 (68.6–98.7)	70.8 (56.6–83.9)	90 Ma (Janssen and Bremer 2004)1; 66 Ma (Chen et al. 2013)7; 52.3 Ma (Magallón et al. 2015)11; 71.3 Ma (McLay and Bayly 2016)12.
Xeronemataceae	89.8 (72.8–104.7)	NA	63 or 43.6 Ma (Chen et al. 2013)7; 67.6 Ma (Magallón et al. 2015)11; 54.2 Ma (Xie et al. 2020)10; 72.4 Ma (Ji et al. 2023)13.
Iridaceae	96.8 (78.1–113.2)	69.8 (54.8–85.3)	96 Ma (Janssen and Bremer 2004)1; 71.6 Ma (Joyce et al. 2018)14; 70 or 66 Ma (Goldblatt et al. 2008)15; 58.5 or 51.2 Ma (Chen et al. 2013)7.
Tecophilaeaceae	72.4 (50.0–95.0)	31.0 (11.6–49.5)	87 Ma (Janssen and Bremer 2004)1; ca 77 Ma (Buerki et al. 2013)16; 30 or ca. 20.4 Ma (Chen et al. 2013)7.
Ixioliriaceae	72.4 (50.0–95.0)	NA	NA
Doryanthaceae	104.0 (84.2–121.9)	NA	NA
Hypoxidaceae	52.6 (33.1–73.8)	21.0 (12.6–30.2)	78 Ma (Janssen and Bremer 2004)1; 23/ca 15.6 Ma (Chen et al. 2013)7; or 32.5 Ma (Birch and Kocyan 2021)17.
Lanariaceae	52.6 (33.1–73.8)	NA	NA
Asteliaceae	66.1 (45.3–90.0)	NA	92 Ma (Janssen & Bremer 2004)1; 55.4 Ma (Birch et al. 2012)18; and 32.6 or 29.5 Ma (S. Chen et al. 2013)7;53.8 Ma (Birch and Keeley 2013)19; 49.3(-37.1) Ma (Birch and Kocyan 2021)17.
Boryaceae	96.8 (71.4–117.2)	NA	54 Ma (Janssen and Bremer 2004)1; 37.8 Ma (Birch and Kocyan 2021)17.
Orchidaceae	123.1 (99.2–143.8)	99.2 (76.1–119.3)	111 Ma (Janssen and Bremer 2004)1; 98.9 Ma (Ji et al. 2023)13; 101.5 Ma (Zhang et al. 2023)20; 83±10 Ma (Pérez-Escobar et al. 2024)21.
References
1. Janssen, T. & Bremer, K. The age of major monocot groups inferred from 800+rbcL sequences. Bot. J. Linn. Soc. 146, 385–398 (2004).
2. Givnish, T. J. et al. Monocot plastid phylogenomics, timeline, net rates of species diversification, the power of multi‐gene analyses, and a functional model for the origin of monocots. Am. J. Bot. 105, 1888–1910 (2018).
3. Hertweck, K. L. et al . Phylogenetics, divergence times and diversification from three genomic partitions in monocots. Bot. J. Linn. Soc. 178, 375–393 (2015).
4. Li, H. T. et al. Origin of angiosperms and the puzzle of the Jurassic gap. Nat. Plants 5, 461–470 (2019).
5. Silvestro, D. et al. Fossil data support a pre-Cretaceous origin of flowering plants. Nat. Ecol. Evol. 5, 449–457 (2021).
6. Ji, Y. et al. Phylogeny and evolution of Asparagaceae subfamily Nolinoideae: new insights from plastid phylogenomics. Ann. Bot. 131, 301–312 (2023).
7. Chen, S., Kim, D.-K., Chase, M. W. & Kim, J.-H. Networks in a large-scale phylogenetic analysis: Reconstructing evolutionary history of Asparagales (Lilianae) based on four plastid genes. PLoS ONE 8, e59472 (2013).
8. Han, T. et al. Polyploidy promotes species diversification of Allium through ecological shifts. New Phytol. 225, 571–583 (2020).
9. Costa, L. et al. Divide to conquer: Evolutionary history of Allioideae tribes (Amaryllidaceae) is linked to distinct trends of karyotype evolution. Front. Plant Sci. 11, 320 (2020).
10. Xie, D. F. et al. Insights into phylogeny, age and evolution of Allium (Amaryllidaceae) based on the whole plastome sequences. Ann. Bot. 125, 1039–1055 (2020).
11. Magallón, S., Gómez‐Acevedo, S., Sánchez‐Reyes, L. L., & Hernández‐Hernández, T. A metacalibrated time‐tree documents the early rise of flowering plant phylogenetic diversity. New Phytol. 207, 437–453 (2015).
12. McLay, T. G. B. & Bayly, M. J. A new family placement for Australian blue squill, Chamaescilla: Xanthorrhoeaceae (Hemerocallidoideae), not Asparagaceae. Phytotaxa 275, 97–111 (2016).
13. Ji, Y. et al. Phylogeny and evolution of Asparagaceae subfamily Nolinoideae: new insights from plastid phylogenomics. Ann. Bot. 131, 301–312 (2023).
14. Joyce, E. M. et al. Evolution of Geosiris (Iridaceae): Historial biogeography and plastid-genome evolution in a genus of non-photosynthetic tropical rainforest herbs disjunct across the Indian Ocean. Aust. Syst. Bot. 31, 504–522 (2018).
15. Goldblatt, P. et al. Iridaceae 'out of Australia'? Phylogeny, biogeography and divergence times based on plastid DNA sequences. Syst. Bot. 33, 495–508 (2008).
16. Buerki, S., Manning, J. C. & Forest, F. Spatio-temporal history of the disjunct family Tecophilaeaceae: a tale involving the colonization of three Mediterranean-type ecosystems. Ann. Bot. 111, 361–373 (2013).
17. Birch, J. L. & Kocyan, A. Biogeography of the monocotyledon astelioid clade (Asparagales): A history of long-distance dispersal and diversification with emerging habitats. Mol. Phylogenet. Evol. 163, 107203 (2021).
18. Birch, J. L., Keeley, S. C. & Morden, C. W. Molecular phylogeny and dating of Asteliaceae (Asparagales): Astelia s.l. evolution provides insight into the Oligocene history of New Zealand. Mol. Phylogenet. Evol. 65, 102–115 (2012).
19. Birch, J. L. & Keeley, S. C. Dispersal pathways across the Pacific: the historical biogeography of Astelia s.l. (Asteliaceae, Asparagales). J. Biogeogr. 40, 1914–1927 (2013).
20. Zhang, G. et al. Comprehensive phylogenetic analyses of Orchidaceae using nuclear genes and evolutionary insights into epiphytism. J. Integr. Plant Biol. 65, 1204–1225 (2023).
21. Pérez-Escobar, O. A. et al. The origin and speciation of orchids. New Phytol. 242, 700–716 (2024).

## Sheet: Table S4 Biogeogr. samples
Table S4. Number of taxa used for grafting in biogeographic analyses.
Families	No. of genera (WFO)$	No. of genera used in this study	Notes
Amaryllidaceae*	82	78	The generic relationship in our Fig. 1 was used as backbone, and genera inferred from our ITS tree were added to it.
Asparagaceae*	118	66	The generic relationship from Cole (2023)1. was used as backbone, and genera inferred from our ITS tree were added to it.
Asphodelaceae*	58	40	The generic relationship from Devey et al. (2006)2. was used as backbone, and genera inferred from our ITS tree were added to it.
Asteliaceae	3	3	A relationship of ((Milligania, Neoaselia)), Astelia), according to Birch et al. (2012)3.
Blandfordiaceae	1	1	This family was not in our Fig. 1. We added this family to our nuclear ortholog tree according to APG IV.
Boryaceae	2	2	NA
Doryanthaceae	1	1	NA
Hypoxidaceae	5	5	Relationship of (((Curculigo,Sinocurculigo),Hypoxis),(Empodium,Pauridia)), according to Liu et al. (2012)4.
Iridaceae*	69	36	The generic relationship from Kamra et al. (2023)5 was used as backbone, and genera inferred from our ITS tree were added to it.
Ixioliriaceae	1	1	NA
Lanariaceae	1	1	NA
Orchidaceae	2574 genera, 19 tribes, 43 subtribes	67	According to the tribes of Zhang et al. (2023)6. However, nine genera within tribe Vaniilloideae was used. Phylogeny within Vaniiloideae was accessed from Pansarin et al. (2008)7 and Pérez-Escobar et al. (2024)8.
Tecophilaeaceae*	9	8	Our ITS tree nested Zephyra within Tecophilaea. Zephara was added to a tree in Buerki et al. (2013)9. A relationship of (((Zephyra,Tecophilaea),Conanthera),(Odontostomum,((Cyanastrum,Kabuyea),(Walleria,(Eremiolirion,Cyanella))))) was used.
Xeronemataceae	1	1	NA bbb
$Checked according to the World Flora Online (https://www.worldfloraonline.org/).
*Maximum likelihood trees were constructed for each of these families using available ITS sequences in NCBI GenBank separately.
References
1. Cole, T. C. H. Asparagaceae Phylogeny Poster (2023).
2. Devey, D. S. et al. Systematics of Xanthorrhoeaceae sensu lato, with an emphasis on Bulbine. Aliso 22, 345–351 (2006).
3. Birch, J. L., Keeley, S. C. & Morden, C. W. Molecular phylogeny and dating of Asteliaceae (Asparagales): Astelia s.l. evolution provides insight into the Oligocene history of New Zealand. Mol. Phylogenet. Evol. 65, 102–115 (2012).
4. Liu, K. W. et al. Sinocurculigo, a new genus of Hypoxidaceae from China based on molecular and morphological evidence. PLoS ONE 7, e38880 (2012).
5. Kamra, K., Jung, J. & Kim, J. H. A phylogenomic study of Iridaceae Juss. based on complete plastid genome sequences. Front. Plant Sci. 14, 1066708 (2023).
6. Zhang, G. et al. Comprehensive phylogenetic analyses of Orchidaceae using nuclear genes and evolutionary insights into epiphytism. J. Integr. Plant Biol. 65, 1204–1225 (2023).
7. Pansarin, E. R., Salatino, A. & Salatino, M. L. F. Phylogeny of South American Pogonieae (Orchidaceae, Vanilloideae) based on sequences of nuclear ribosomal (ITS) and chloroplast (psaB, rbcL, rps16, and trnL-F) DNA, with emphasis on Cleistes and discussion of biogeographic implications. Org. Divers. Evol. 8, 171–181 (2008).
8. Pérez-Escobar, O. A. et al. The origin and speciation of orchids. New Phytol. 242, 700–716 (2024).
9. Buerki, S., Manning, J. C. & Forest, F. Spatio-temporal history of the disjunct family Tecophilaeaceae: a tale involving the colonization of three Mediterranean-type ecosystems. Ann. Bot. 111, 361–373 (2013).

## Sheet: Table S5 Biogeogr. results
Table S5. Biogeography of Asparagales compiled from previous studies.
Taxon	No. of genera in each family	Origin areas in previous studies	Origin areas inferred from this study	References	Notes
Asparagales		Originated from Australia	Originated from Australia	Bremer et al. (2006)1	Bremer et al. (2016)1 investigated the biogeography of monocots, which was represented by families. In their paper, Asparagales likely originated from Australia.
Amaryllidaceae*	82	Not reported	Originated from Africa		There has been no comprehensive study on the biogeography of Amaryllidaceae.
Genus Allium		Originated from eastern Asia		Li et al. (2010)2	Li et al. (2010)1 used ITS and rpl16 to construct phylogenies and reconstructed the evolutionary history of Allium.
Asparagaceae*	118	Not reported	Originated from Africa		There has been no comprehensive study on the biogeography of Asparagaceae.
Genus Asparagus		Originated from S Africa		Norup et al. (2015)3
Asphodelaceae*	58	Not reported	Originated from Africa		There has been no comprehensive study on the biogeography of Asphodelaceae.
Asteliaceae	3	Originated in Australia	Originated from Australia	Birch and Keeley (2013)4; Birch and Kocyan (2021)5.
Blandfordiaceae	1	Australia		Birch and Kocyan (2021)5	Ancestral range of the Boryaceae and Blandfordiaceae was reconstructed as Australia/Papua New Guinea (Birch and Kocyan 2021)5.
Boryaceae	2	Australia	Originated from Australia	Birch and Kocyan (2021)5	Ancestral range of the Boryaceae and Blandfordiaceae was reconstructed as Australia/Papua New Guinea (Birch and Kocyan 2021)5.
Doryanthaceae	1	Distributed in Australia		https://powo.science.kew.org/taxon/urn:lsid:ipni.org:names:1443-1
Hypoxidaceae	5	Africa or Australia	Africa	Kocyan et al. (2011)6; Birch and Kocyan (2021)5	There is no clear evidence for the origin of Hypoxidaceae
Iridaceae	69	Out of Australasia	Australia	Goldblatt et al. (2008)7	https://www.ingentaconnect.com/content/aspt/sb/2008/00000033/00000003/art00004
Ixioliriaceae	1	Distributed in M Asia and West China		https://powo.science.kew.org/taxon/urn:lsid:ipni.org:names:1510-1#distributions
Lanariaceae	1	Lanariaceae occurs solely in the Cape region of South Africa		Birch and Kocyan (2021)5
Orchidaceae	2574 genera, 19 tribes, 43 subtribes	Originated from Australia	Australia + South America	Givnish et al. (2016)8
Tecophilaeaceae	9	Originated from the Gondwana,	Africa, South America, Australia	Buerki et al. (2013)9	Diversification of the family were influenced primarily by the break up of Gondwana (Buerki et al. 2013)9.
Xeronemataceae	1	Distributed in New Caledonia and New Zealand		https://powo.science.kew.org/taxon/urn:lsid:ipni.org:names:24911-1
*The three famlies with biogeographic origin not resolved in previous studies.
References
1. Bremer, K. & Janssen, T. Gondwanan origin of major monocot groups inferred from dispersal-vicariance analysis. Aliso 22, 22–27 (2006).
2. Li, Q. Q. et al. Phylogeny and biogeography of Allium (Amaryllidaceae: Allieae) based on nuclear ribosomal internal transcribed spacer and chloroplast rps16 sequences, focusing on the inclusion of species endemic to China. Ann. Bot. 106, 709–733 (2010).
3. Norup, M. F. et al. Evolution of Asparagus L. (Asparagaceae): Out-of-South-Africa and multiple origins of sexual dimorphism. Mol. Phylogenet. Evol. 92, 25–44 (2015).
4. Birch, J. L. & Keeley, S. C. Dispersal pathways across the Pacific: the historical biogeography of Astelia s.l. (Asteliaceae, Asparagales). J. Biogeogr. 40, 1914–1927 (2013).
5. Birch, J. L. & Kocyan, A. Biogeography of the monocotyledon astelioid clade (Asparagales): A history of long-distance dispersal and diversification with emerging habitats. Mol. Phylogenet Evol. 163, 107203 (2021).
6. Kocyan, A. et al. Molecular phylogenetics of Hypoxidaceae--evidence from plastid DNA data and inferences on morphology and biogeography. Mol. Phylogenet. Evol. 60, 122–136 (2011).
7. Goldblatt, P. et al. Iridaceae 'out of Australia'? Phylogeny, biogeography and divergence times based on plastid DNA sequences. Syst. Bot. 33, 495–508 (2008).
8. Givnish, T. J. et al. Phylogenomics and historical biogeography of the monocot order Liliales: out of Australia and through Antarctica. Cladistics 32, 581–605 (2016).
9. Buerki, S., Manning, J. C. & Forest, F. Spatio-temporal history of the disjunct family Tecophilaeaceae: a tale involving the colonization of three Mediterranean-type ecosystems. Ann. Bot. 111, 361–373 (2013).

## Sheet: Table S6 Metabolites
Table S6. Qualitative identification of S-alk(en)ylcysteine sulfoxides and their precursors.
Compounds	Formula	Authentic standards			Allium sativum				Allium cepa				Allium fistulosum				Allium tuberosum				Allium macrostemon				Allium microdictyum				Allium taishanense				Allium neriniflorum				Allium prostratum
		[M + H] + (measure)	Fragments	Rt (min)	[M + H] + (measure)	Mass Errors (ppm)	Fragments	Rt (min)	[M + H] + (measure)	Mass Errors (ppm)	Fragments	Rt (min)	[M + H] + (measure)	Mass Errors (ppm)	Fragments	Rt (min)	[M + H] + (measure)	Mass Errors (ppm)	Fragments	Rt (min)	[M + H] + (measure)	Mass Errors (ppm)	Fragments	Rt (min)	[M + H] + (measure)	Mass Errors (ppm)	Fragments	Rt (min)	[M + H] + (measure)	Mass Errors (ppm)	Fragments	Rt (min)	[M + H] + (measure)	Mass Errors (ppm)	Fragments	Rt (min)	[M + H] + (measure)	Mass Errors (ppm)	Fragments	Rt (min)
Allicin	C6H10OS2				163.025	1.34	163.0255, 91.0219	0.87	ND	ND	ND	ND	ND	ND	ND	ND	163.025	0.72	163.0256，91.0216	0.87	ND	ND	ND	ND	163.025	1.96	163.025	0.83	ND	ND	ND	ND	ND	ND	ND	ND	ND	ND	ND	ND
S-allylcysteine	C6H11NO2S	162.058	162.0589, 145.0318, 73.0109, 41.0387	1.4	162.059	1.7	162.0589, 145.0320, 73.0110, 41.0388	1.4	162.059	1.7	162.0588, 145.0317, 73.0102	1.33	162.058	-2.02	162.0587, 145.0321	1.61	162.058	-1.4	145.0320, 73.0108	1.56	162.058	-1.4	162.0585, 145.0325	1.45	162.059	1.7	162.0590, 145.0322, 73.0109	1.41	162.058	-0.16	162.0589, 145.0320, 73.0110	1.41	ND	ND	ND	ND	ND	ND	ND	ND
Gamma-glutamyl-S-allylcysteine	C11H18N2O5S				291.1010	0.28	291.1010, 162.0584	1.8	291.101	1.66	291.1026, 162.0587	1.73	ND	ND	ND	ND	291.102	3.04	291.1025, 162.0590	1.76	291.101	1.66	291.1300, 291.1025, 162.0590	1.79	291.102	3.04	291.102	1.77	ND	ND	ND	ND	ND	ND	ND	ND	ND	ND	ND	ND
Valine	C5H11NO2				118.086	-0.47	118.0863, 72.0818	1.89	118.087	3.8	118.0866, 72.0808	1.85	118.086	-0.47	118.0866, 72.0807	1.85	118.086	-2.18	118.0866, 72.0809	1.81	118.086	-0.47	118.0864, 72.0809	1.85	118.086	-1.32	118.0863, 72.0807	1.84	118.086	-0.47	118.0864, 72.0809	1.83	118.086	-2.18	118.0865, 72.0812	1.86	118.086	-1.32	118.0862, 72.0808	1.81
Glutathione	C10H17N3O6S	308.091	308.0913, 233.0595, 179.0488, 162.0222, 130.0495, 76.0217	2.59	ND	ND	ND	ND	ND	ND	ND	ND	ND	ND	ND	ND	ND	ND	ND	ND	ND	ND	ND	ND	ND	ND	ND	ND	ND	ND	ND	ND	ND	ND	ND	ND	308.091	1.03	308.0918, 179.0489, 162.0221	2.66
Isoalliin	C6H11NO3S	178.0530	178.0540, 114.0382, 89.0479, 88.0394, 70.0292, 42.0339	2.87	ND	ND	ND	ND	178.053	0.34	178.0539, 88.0395, 73.0108	2.99	178.053	-0.23	178.0537, 88.0391	2.86	ND	ND	ND	ND	178.053	0.9	178.0534, 88.0395	2.95	178.053	0.34	178.0537，88.0394	2.99	178.053	-0.23	178.0533, 88.0394, 73.0106	2.98	178.054	2.03	178.0533, 88.0391	2.98	178.053	-2.49	178.0528, 88.0387	2.97
Alliin	C6H11NO3S	178.052	178.0527, 161.0264, 137.0136, 120.0111, 88.0390, 70.0288, 44.0494, 42.0335	2.96	178.053	-1.92	178.0534, 161.0276, 120.0118, 88.0397, 42.0342	2.85	ND	ND	ND	ND	ND	ND	ND	ND	178.053	0.23	178.0538, 161.0268, 137.0141, 120.0116, 88.0394, 42.0339	2.9	ND	ND	ND	ND	178.054	2.03	178.0539，161.0269，137.0139，120.0124，88.0394，42.0336	2.87	ND	ND	ND	ND	ND	ND	ND	ND	ND	ND	ND	ND
Serine	C3H7NO3				106.05	0.29	106.0498, 70.0297	3.2	106.049	-3.52	106.0502, 70.0290	3.22	106.05	-0.66	106.05	3.1	106.049	-4.47	106.0498, 70.0284	3.18	106.05	0.29	106.05	3.17	106.05	-0.66	106.0498, 70.0293	3.15	106.05	0.29	106.0499, 70.0286	3.12	ND	ND	ND	ND	106.05	-1.61	106.0498, 70.0282	3.11
Compounds	Formula	Zephyranthes candida				Asparagus officinalis				Yucca gloriosa				Curculigo orchioides				Iris tectorum				Hemerocallis fulva				Bletilla striata
		[M + H] + (measure)	Mass Errors (ppm)	Fragments	Rt (min)	[M + H] + (measure)	Mass Errors (ppm)	Fragments	Rt (min)	[M + H] + (measure)	Mass Errors (ppm)	Fragments	Rt (min)	[M + H] + (measure)	Mass Errors (ppm)	Fragments	Rt (min)	[M + H] + (measure)	Mass Errors (ppm)	Fragments	Rt (min)	[M + H] + (measure)	Mass Errors (ppm)	Fragments	Rt (min)	[M + H] + (measure)	Mass Errors (ppm)	Fragments	Rt (min)
Allicin	C6H10OS2	ND	ND	ND	ND	ND	ND	ND	ND	ND	ND	ND	ND	ND	ND	ND	ND	ND	ND	ND	ND	ND	ND	ND	ND	ND	ND	ND	ND
S-allylcysteine	C6H11NO2S	ND	ND	ND	ND	ND	ND	ND	ND	ND	ND	ND	ND	ND	ND	ND	ND	ND	ND	ND	ND	ND	ND	ND	ND	ND	ND	ND	ND
Gamma-glutamyl-S-allylcysteine	C11H18N2O5S	ND	ND	ND	ND	ND	ND	ND	ND	ND	ND	ND	ND	ND	ND	ND	ND	ND	ND	ND	ND	ND	ND	ND	ND	ND	ND	ND	ND
Valine	C5H11NO2	118.086	-1.32	118.0863, 72.0809	1.81	118.086	-0.47	118.0862, 72.0810	1.82	118.086	-2.18	118.0867, 72.0805	1.87	118.086	-0.47	118.0866, 72.0804	1.86	118.086	-0.47	118.086	1.83	118.086	-1.32	118.0865, 72.0807	1.85	ND	ND	ND	ND
Glutathione	C10H17N3O6S	308.091	-0.27	179.0484, 162.0224	2.68	ND	ND	ND	ND	ND	ND	ND	ND	ND	ND	ND	ND	308.092	2.01	308.0911, 179,0487	2.62	308.092	1.69	308.0919, 179.0487, 162.0226, 76.0228	2.62	308.091	0.38	308.0917, 179.0486, 162.0223	2.67
Isoalliin	C6H11NO3S	ND	ND	ND	ND	ND	ND	ND	ND	ND	ND	ND	ND	ND	ND	ND	ND	ND	ND	ND	ND	ND	ND	ND	ND	ND	ND	ND	ND
Alliin	C6H11NO3S	ND	ND	ND	ND	ND	ND	ND	ND	ND	ND	ND	ND	ND	ND	ND	ND	ND	ND	ND	ND	ND	ND	ND	ND	ND	ND	ND	ND
Serine	C3H7NO3	106.05	-1.61	106.0498, 70.0289	3.15	106.05	0.29	106.0495, 70.0284	3.11	ND	ND	ND	ND	106.05	-2.57	106.0494, 88.0388	3.17	106.049	-7.33	106.0640, 88.0403	3.14	ND	ND	ND	ND	ND	ND	ND	ND
ND = not detected.

## Sheet: Table S7 Swipe
Table S7. Gene used as baits to identify homolog genes and Pfam accession numbers used for filtering.
	Pathway 1				Pathway 2				Allium specific pathway
	OASTL	GSH1a	GCL	GSH2	AHAS	KARI	DHAD	BCAT	PCS1	GGT1	FMO1	Alliinase	LFS
GenBank IDs or IDs in Allium sativum genome used as baits	BAK38374.11	Asa0G01394.12	[3]*	$Asa3G01581.1	At3g485604	At3g586104	At3g239404	AT3G496804	Asa0G04380.1$	LC0080105	AB9243835	Asa5G05560.1$	BAC21275.17
Pfam accession number	PF00291	PF04107	PF04107	PF03917/PF03199	PF02776/PF00205/PF02775	PF07991/PF01450	PF00920	PF01063	PF05023/PF09328	PF01019	PF00743	PF04864/PF04863	PF10604
Notes	Function of BAK38374.1 was validated using wet-lab experiments1.	-	Function of AcGCL was validated using wet-lab experiments1.	-	-	-	-	-	-	Enzymatic activities of AsGGT1, AsGGT2, and AsGGT3 were validated using wet lab experiments6.	Function of AsFMO1 was validated using wet-lab experiments5.	-	Function of LFS was validated using wet lab experiments7.
*Sequence for AcGCL was cited from Fig. S4 in Luo et al. (2021)3
$Allium sativum2 genome used as baits
References
1. Rashid, M. H. U. et al. Molecular characterization of cytosolic cysteine synthase in Mimosa pudica. J. Plant Res. 131, 319–329 (2018).
2. Sun, X. et al. A chromosome-level genome assembly of garlic (Allium sativum) provides insights into genome evolution and allicin biosynthesis. Mol. Plant 13, 1328–1339 (2020).
3. Luo, W. et al. A γ-glutamylcysteine ligase AcGCL alleviates cadmium-inhibited fructooligosaccharides metabolism by modulating glutathione level in Allium cepa L. J. Hazard. Mater. 419, 126255 (2021).
4. Binder, S., Knill, T. & Schuster, J. Branched‐chain amino acid metabolism in higher plants. Physiol. Plant 129, 68–78 (2007).
5. Yoshimoto, N. et al. Identification of a flavin‐containing S‐oxygenating monooxygenase involved in alliin biosynthesis in garlic. Plant J. 83, 941–951 (2015).
6. Yoshimoto, N. et al. Garlic gene gamma-glutamyl transpeptidases that catalyze deglutamylation of biosynthetic intermediate of alliin. Front. Plant Sci. 5, 758 (2015).
7. Imai, S. et al. An onion enzyme that makes the eyes water. Nature 419, 685–685 (2002).

## Sheet: Table S8 Counts
Table S8. Number of genes copy for genes involved in CSO biosynthetic pathway.
Species	Family	Class	Data type	Sources of data	Species abbreviation	Pathway 1				Pathway 2				Allium specific pathway
						OASTL	GSH1	GCL	GSH2	AHAS	KARI	DHAD	BCAT	PCS	GGT	FMO	Alliinase	LFS
Agapanthus africanus (L.) Hoffmanns.	Amaryllidaceae	Asparagales	Transcriptome	ERR2040716	agapaafric	4	2	2	2	4	6	2	3	0	4	3	0	2
Agapanthus praecox subsp. orientalis (F.M.Leight.) F.M.Leight	Amaryllidaceae	Asparagales	Transcriptome	SRR850813	agapapraec	4	2	2	3	4	2	2	4	3	7	2	2	1
Allium macrostemon Bunge	Amaryllidaceae	Asparagales	Transcriptome	XXXXXXXXXX	alliumacro	3	3	3	1	4	2	1	2	1	6	1	15	10
Allium ursinum L.	Amaryllidaceae	Asparagales	Transcriptome	SRR9077159	alliuursin	2	2	2	1	2	1	1	3	0	3	1	8	6
Allium fistulosum L.	Amaryllidaceae	Asparagales	Genome	https://ftp.cngb.org/pub/CNSA/data5/CNP0002276/CNS0461863/CNA0047403/	alliufistu	14	7	7	1	2	7	1	6	1	4	1	62	43
Allium tuberosum Rottler ex Spreng.	Amaryllidaceae	Asparagales	Transcriptome	CQ00617	allituber	2	2	2	1	4	3	1	3	1	5	1	10	4
Allium cepa L.	Amaryllidaceae	Asparagales	Genome	https://www.oniongenome.wur.nl/(v1.2)	alliucepav12	16	5	5	2	5	2	1	6	1	8	3	70	27
Allium sativum L.	Amaryllidaceae	Asparagales	Genome	https://figshare.com/search?q=garlic (Dataset posted on 2020-06-24)	Garlic	5	4	4	1	4	2	3	5	2	7	1	60	33
Allium ampeloprasum L.	Amaryllidaceae	Asparagales	Transcriptome	SRR3144541	alliuampel	8	2	2	1	2	5	1	3	1	6	1	10	8
Allium commutatum Guss	Amaryllidaceae	Asparagales	Transcriptome	ERR2040722	alliucommu	3	4	4	5	9	8	3	2	3	14	1	4	12
Allium macranthum Baker	Amaryllidaceae	Asparagales	Transcriptome	XXXXXXXXXX	alliumacra	11	2	2	5	4	7	2	6	2	9	4	13	8
Allium mongolicum Regel	Amaryllidaceae	Asparagales	Transcriptome	SRR8704488	alliumongo	7	14	14	2	4	16	9	8	2	16	4	36	28
Allium hookeri Thwaites	Amaryllidaceae	Asparagales	Transcriptome	SRR18933341	alliuhookencbi341	6	4	4	2	4	9	2	8	2	8	6	14	20
Allium schoenoprasum L.	Amaryllidaceae	Asparagales	Transcriptome	SRR19650911	alliuschoe	5	4	4	1	3	4	2	3	1	7	2	14	9
Allium victorialis L.	Amaryllidaceae	Asparagales	Transcriptome	XXXXXXXXXX	alliuvicto461	7	2	2	2	6	6	4	2	2	14	3	4	14
Allium stipitatum Regel	Amaryllidaceae	Asparagales	Transcriptome	SRR13285938	alliuhirti	7	3	3	3	2	5	1	3	1	10	2	8	6
Allium angulosum L.	Amaryllidaceae	Asparagales	Transcriptome	SRR9077156	alliuangul	3	2	2	1	3	5	1	4	1	3	1	10	8
Allium anisopodium Ledeb.	Amaryllidaceae	Asparagales	Transcriptome	XXXXXXXXXX	allani	27	5	5	2	4	9	2	8	2	6	1	25	12
Allium ascalonicum L	Amaryllidaceae	Asparagales	Transcriptome	SRR3144570	alliuascal	3	2	2	1	3	4	1	4	1	6	2	8	6
Allium brevidentatum F.Z.Li	Amaryllidaceae	Asparagales	Transcriptome	XXXXXXXXXX	allbre	7	4	4	2	4	5	1	10	2	10	3	13	12
Allium chinense G.Don	Amaryllidaceae	Asparagales	Transcriptome	SRR3144560	alliuchine	4	3	3	2	6	2	1	5	1	4	1	8	8
Allium cyathophorum var. farreri (Stearn) Stearn	Amaryllidaceae	Asparagales	Transcriptome	SRR10828152	alliucyath	9	2	2	2	8	4	2	8	2	9	6	14	14
Allium ericetorum Thore	Amaryllidaceae	Asparagales	Transcriptome	SRR9077153	alliuerice	3	2	2	1	6	2	1	4	1	4	1	12	5
Allium mairei H.Lév.	Amaryllidaceae	Asparagales	Transcriptome	SRR10828149	alliumaire	10	10	10	2	11	16	4	15	2	7	2	19	22
Allium neriniflorum (Herb.) G.Don	Amaryllidaceae	Asparagales	Transcriptome	XXXXXXXXXX	allner	2	2	2	0	3	3	1	2	1	4	1	6	3
Allium nutans L.	Amaryllidaceae	Asparagales	Transcriptome	SRR9077154	alliunutan	2	2	2	1	3	4	1	4	1	5	1	13	8
Allium paepalanthoides Airy Shaw	Amaryllidaceae	Asparagales	Transcriptome	CC00567	alliupaepa	6	5	5	2	4	9	1	5	2	9	2	12	22
Allium polyrhizum Turcz. ex Regel	Amaryllidaceae	Asparagales	Transcriptome	XXXXXXXXXX	allpol	5	3	3	2	9	10	4	5	3	11	3	3	13
Allium prattii C.H.Wright	Amaryllidaceae	Asparagales	Transcriptome	XXXXXXXXXX	alliupratt	27	2	2	2	4	9	4	6	2	15	2	14	16
Allium prostratum Trevir.	Amaryllidaceae	Asparagales	Transcriptome	XXXXXXXXXX	allpro	5	2	2	1	4	3	1	4	1	3	3	10	7
Allium przewalskianum Regel	Amaryllidaceae	Asparagales	Transcriptome	SRR10828148	alliuprzew	5	2	2	7	5	5	2	5	2	13	7	14	14
Allium ramosum L.	Amaryllidaceae	Asparagales	Transcriptome	XXXXXXXXXX	alliuramos	8	4	4	4	16	8	2	5	2	8	4	21	22
Allium taishanense J.M.Xu	Amaryllidaceae	Asparagales	Transcriptome	XXXXXXXXXX	alltai	5	3	3	1	5	3	1	5	1	3	1	8	6
Allium tenuissimum L.	Amaryllidaceae	Asparagales	Transcriptome	XXXXXXXXXX	alltenui	8	6	6	2	6	12	4	5	3	9	4	16	13
Allium tetraploideum M.J.Li & X.J.He	Amaryllidaceae	Asparagales	Transcriptome	SRR10828151	alliutetra	7	2	2	2	5	6	2	9	2	8	2	13	13
Allium listera Stearn	Amaryllidaceae	Asparagales	Transcriptome	SRR11818591	alliuliste	6	4	4	0	2	4	1	4	0	6	0	6	5
Allium wallichii Kunth	Amaryllidaceae	Asparagales	Transcriptome	XXXXXXXXXX	alliuwalli238	8	4	4	2	4	8	3	8	2	8	2	15	19
Allium thunbergii G.Don	Amaryllidaceae	Asparagales	Transcriptome	XXXXXXXXXX	allthu	7	8	8	2	4	6	2	8	2	10	4	20	17
Allium microdictyon Prokh.	Amaryllidaceae	Asparagales	Transcriptome	XXXXXXXXXX	alliumicro	1	2	2	1	2	1	1	3	1	2	1	10	7
Amaryllis belladonna L.	Amaryllidaceae	Asparagales	Transcriptome	ERR2040723	amarybella	2	1	1	2	5	2	3	2	0	2	3	0	1
Clivia miniata (Lindl.) Bosse	Amaryllidaceae	Asparagales	Transcriptome	XXXXXXXXXX	cliviminia	4	2	2	2	4	2	1	9	2	4	3	1	3
Crinum asiaticum var. sinicum (Roxb. ex Herb.) Baker	Amaryllidaceae	Asparagales	Transcriptome	XXXXXXXXXX	crinuasiat	4	2	2	3	6	3	2	11	3	5	2	0	5
Galanthus elwesii Hook.f.	Amaryllidaceae	Asparagales	Transcriptome	SRR3038644	galanelwes	4	2	2	2	5	2	3	4	3	4	2	0	2
Hippeastrum striatum (Lam.) H.E.Moore	Amaryllidaceae	Asparagales	Transcriptome	XXXXXXXXXX	hipperutil159	2	0	0	3	8	2	2	2	6	6	2	0	2
Leucojum aestivum L.	Amaryllidaceae	Asparagales	Transcriptome	SRR14196981	leucoaesti	3	1	1	1	3	3	2	2	1	2	1	1	1
Lycoris aurea (L'Hér.) Herb.	Amaryllidaceae	Asparagales	Transcriptome	XXXXXXXXXX	lycoraurea	5	2	2	2	5	3	4	11	4	4	2	0	3
Lycoris chinensis Traub	Amaryllidaceae	Asparagales	Transcriptome	SRR19578267	lycorchine	4	2	2	1	6	2	6	2	2	3	2	0	2
Lycoris longituba Y.C.Hsu & G.J.Fan	Amaryllidaceae	Asparagales	Transcriptome	SRR10572829	lycorlongi	5	2	2	2	6	2	2	5	2	5	1	0	2
Lycoris radiata (L'Hér.) Herb.	Amaryllidaceae	Asparagales	Transcriptome	XXXXXXXXXX	lycorradia804	6	4	4	1	4	2	2	4	2	5	2	0	2
Lycoris sprengeri Comes ex Baker	Amaryllidaceae	Asparagales	Transcriptome	SRR13966063	lycorspren	7	2	2	3	6	5	3	8	2	6	1	2	2
Molineria capitulata (Lour.) Herb	Hypoxidaceae	Asparagales	Transcriptome	XXXXXXXXXX	curcucapit	7	2	2	2	5	8	2	9	0	6	3	3	0
Narcissus papyraceus Ker Gawl.	Amaryllidaceae	Asparagales	Transcriptome	SRR6041662	narcipapyr	3	1	1	1	3	1	1	2	2	2	1	0	1
Narcissus pseudonarcissus L.	Amaryllidaceae	Asparagales	Transcriptome	SRR8115251	narcipseud	5	2	2	5	9	6	7	3	3	3	2	1	3
Narcissus tazetta L.	Amaryllidaceae	Asparagales	Transcriptome	SRR4071976	narcitazet	4	2	2	2	8	2	1	4	2	3	2	2	2
Narcissus viridiflorus Schousb	Amaryllidaceae	Asparagales	Transcriptome	ERR2040724	narcivirid	3	2	2	2	7	2	3	4	2	7	2	2	2
Phycella chilensis (L'Hér.) Grau ex Nic.García	Amaryllidaceae	Asparagales	Transcriptome	ERR2040726	phycechile	3	6	6	4	6	2	4	2	2	5	4	0	2
Scadoxus multiflorus (Martyn) Raf	Amaryllidaceae	Asparagales	Transcriptome	XXXXXXXXXX	haemamulti	7	2	2	2	4	2	2	4	2	2	3	0	2
Traubia modesta (Phil.) Ravenna	Amaryllidaceae	Asparagales	Transcriptome	ERR2040727	traubmodes	1	4	4	0	8	2	4	5	0	3	3	0	1
Tulbaghia violacea Harv.	Amaryllidaceae	Asparagales	Transcriptome	SRR9077157	tulbaviola	2	2	2	1	2	1	1	0	2	3	1	5	1
Zephyranthes candida (Lindl.) Herb	Amaryllidaceae	Asparagales	Transcriptome	XXXXXXXXXX	zephycand	3	1	1	1	8	13	3	2	1	2	1	0	1
Zephyranthes carinata Herb.	Amaryllidaceae	Asparagales	Transcriptome	XXXXXXXXXX	zephycarin	12	2	2	8	6	17	3	5	3	7	6	0	2
Zephyranthes treatiae S.Watson	Amaryllidaceae	Asparagales	Transcriptome	ERR2040728	zephytreat	1	4	4	4	9	4	4	4	0	2	5	0	0
Yucca gloriosa L.	Asparagaceae	Asparagales	Transcriptome	SRR5257975	yuccaglori	2	1	1	1	3	5	2	3	1	3	2	1	2
Asparagus kiusianus Makino	Asparagaceae	Asparagales	Genome	https://plantgarden.jp/ja/search?s=Asparagus+kiusianus&x=0&y=0	asparkiusi855	3	1	1	1	4	2	1	3	1	2	3	2	1
Asparagus officinalis L.	Asparagaceae	Asparagales	Genome	Asparagus officinalis genome assembly Aspof.V1 - NCBI - NLM (nih.gov)	asparoffic7340	3	1	1	2	4	1	1	3	1	2	1	2	1
Hemerocallis citrina Baroni	Asphodelaceae	Asparagales	Transcriptome	XXXXXXXXXX	hemercitri	3	6	6	8	7	6	3	4	3	17	2	0	2
Hemerocallis fulva (L.) L.	Asphodelaceae	Asparagales	Transcriptome	XXXXXXXXXX	hemerfulva	1	2	2	3	4	2	1	1	3	28	1	1	2
Molineria crassifolia Baker	Hypoxidaceae	Asparagales	Transcriptome	XXXXXXXXXX	curcucrass	5	1	1	2	8	11	3	5	0	6	4	2	0
Molineria gracilis Kurz	Hypoxidaceae	Asparagales	Transcriptome	XXXXXXXXXX	curcugraci	2	1	1	1	2	4	1	3	0	2	1	1	0
Curculigo orchioides Gaertn.	Hypoxidaceae	Asparagales	Transcriptome	XXXXXXXXXX	curcuorchi	7	2	2	3	8	4	2	8	1	4	2	3	0
Iris tectorum Maxim.	Iridaceae	Asparagales	Transcriptome	XXXXXXXXXX	iristecto	3	1	1	3	2	4	1	2	1	2	1	1	0
Apostasia shenzhenica Z.J.Liu & L.J.Chen	Orchidaceae	Asparagales	Genome	Apostasia shenzhenica genome assembly ASM278626v1 - NCBI - NLM (nih.gov)	apostshenz678	1	1	1	1	3	3	1	3	1	2	1	0	0
Bletilla striata (Thunb.) Rchb.f.	Orchidaceae	Asparagales	Transcriptome	XXXXXXXXXX	bletistria	1	1	1	1	3	2	1	3	1	1	2	1	0
Cremastra appendiculata (D.Don) Makino	Orchidaceae	Asparagales	Genome	CNA0050867(https://db.cngb.org/)	cremaappen867	1	1	1	1	2	1	1	3	1	2	1	0	0
Cymbidium ensifolium (L.) Sw.	Orchidaceae	Asparagales	Genome	https://ngdc.cncb.ac.cn/gwh/Assembly/20686/show	cymbiensif5355	1	1	1	1	2	1	4	3	2	2	3	1	0
Dendrobium catenatum Lindl.	Orchidaceae	Asparagales	Genome	Genome assembly ASM160598v2, accessed from https://www.ncbi.nlm.nih.gov/datasets/genome/GCF_001605985.2/	dendrcaten598	1	1	1	1	2	1	1	3	1	2	3	1	0
Dendrobium chrysotoxum Lindl.	Orchidaceae	Asparagales	Genome	Genome assembly ASM1992579v1, accessed from https://www.ncbi.nlm.nih.gov/datasets/genome/GCA_019925795.1/	dendrchrys4445	0	1	1	2	1	0	0	3	1	3	2	0	0
Dendrobium nobile Lindl.	Orchidaceae	Asparagales	Genome	Genome assembly Dnobile, accessed from https://www.ncbi.nlm.nih.gov/datasets/genome/GCA_022539455.1/	dendrnobil550	2	1	1	1	3	1	1	3	1	6	2	1	0
Phalaenopsis equestris (Schauer) Rchb.f.	Orchidaceae	Asparagales	Genome	Ggenome assembly ASM126359v1, accessed from https://www.ncbi.nlm.nih.gov/datasets/genome/GCF_001263595.1/	phalaeques	0	0	0	0	0	0	0	0	0	0	0	0	0
Vanilla planifolia Jacks. ex Andrews	Orchidaceae	Asparagales	Genome	Genome assembly Elo_Vpla-B_alternate_1.0 - NCBI - NLM, accessed from https://www.ncbi.nlm.nih.gov/datasets/genome/GCA_016413885.1/	vanilplani740	3	1	1	2	5	1	2	7	0	4	1	1	0
Acorus calamus var. angustatus Besser	Acoraceae	Acorales	Genome	Genomic data,acessed from https://ftp.cngb.org/pub/CNSA/data4/CNP0001708/CNS0456199/CNA0036157/CNSA, accessed no.CNA0036157, accessed Jul.2022	acorutatar	1	0	0	0	6	1	1	5	0	2	0	0	0
Aquilegia coerulea E.James	Ranunculaceae	Ranunculales	Genome	Phytozome Aquilegia coerulea v3.1	aqucoe	1	0	0	0	3	2	1	5	0	3	0	0	0
Pistia stratiotes L.	Araceae	Alismatales	Genome	Genomic data,acessed from https://ftp.cngb.org/pub/CNSA/data3/CNP0002271/CNS0457649/CNA0036302/,accessed no.CNA0036302, accessed Nov.2021	Pstratiotes	2	0	0	0	2	1	2	3	0	3	0	1	0
Spirodela polyrhiza (L.) Schleid.(L.) Schleid.	Araceae	Alismatales	Genome	Genomic data Phytozome V2 Spolyrhiza_290_v2. Accessed Dec 2019	spolyrhiza290	2	0	0	1	2	1	1	2	0	3	0	1	0
Phoenix dactylifera L.	Arecaceae	Arecales	Genome	Genomic data accessed from JCGR website http://www.kacst.edu.sa/en/depts/jcg/home/Pages/default.aspx	phoendacty	8	6	6	4	3	2	1	3	0	3	2	3	0
Ananas comosus (L.) Merr.	Bromeliaceae	Poales	Genome	Phytozome Ananas comosus v3	ananacomos	2	1	1	1	3	2	1	3	0	2	1	1	0
Oryza sativa L.	Poaceae	Poales	Genome	Phytozome Oryza sativa 323 v7.0	Osativa	2	2	2	2	4	2	1	5	0	3	1	0	0
Arabidopsis thaliana (L.) Heynh.	Brassicaceae	Brassicales	Genome	Phytozome Arabidopsis thaliana Araport11	arbidthali447	5	0	0	1	2	1	1	6	0	4	0	0	0
Boechera stricta (Graham) Al-Shehbaz	Brassicaceae	Brassicales	Genome	Phytozome Boechera stricta v1.2	boechstric	4	0	0	1	2	2	1	7	0	3	0	0	0
Capsella grandiflora Boiss.	Brassicaceae	Brassicales	Genome	Phytozome Capsella grandiflora v1.1	capsegrand	4	0	0	1	2	1	1	6	0	3	0	0	0
Descurainia sophioides (Fisch.) O.E.Schulz	Brassicaceae	Brassicales	Genome	Phytozome Descurainia sophioides v1.1	descusophi	5	0	0	1	2	1	1	7	0	4	0	0	0
Glycine max (L.) Merr.	Fabaceae	Fabales	Genome	Phytozome Glycine max Fiskeby v1.1	glymax	11	0	0	4	7	5	1	8	0	5	0	0	0
Malus domestica (Suckow) Borkh.	Rosaceae	Rosales	Genome	Phytozome Malus domestica v1.1	maldom	8	0	0	2	4	3	1	9	0	6	0	0	0
Cleome violacea L.	Cleomaceae	Brassicales	Genome	Phytozome Cleome violacea v2.1	cleomviola	5	0	0	1	2	1	1	6	0	2	0	0	0
Aristolochia fimbriata Cham.	Aristolochiaceae	Piperales	Genome	https://ngdc.cncb.ac.cn/gwh/Assembly/21819/show	arifim	3	0	0	0	3	1	1	3	0	5	0	0	0
Ceratophyllum demersum L.	Ceratophyllaceae	Ceratophyllales	Genome	https://genomevolution.org/coge/SearchResults.pl?s=Ceratophyllum%20demersum&p=genome	cerademe	1	0	0	0	4	7	1	4	0	2	0	0	0
Chloranthus spicatus (Thunb.) Makino	Chloranthaceae	Chloranthales	Genome	Accessed from https://ftp.cngb.org/pub/CNSA/data3/CNP0001771/CNS0360341/CNA0020810/	chlspi	1	0	0	0	5	2	1	2	0	5	0	0	0
Cinnamomum kanehirae	Lauraceae	Laurales	Genome	Phytozome Ckanehirae_531_v3	cinnkane	2	0	0	0	5	1	1	4	0	2	0	0	0
Amborella trichopoda Baill.	Amborellaceae	Amborellales	Genome	Phytozome Amborella trichopoda v1.0	ambtri	3	0	0	0	1	1	1	3	0	20	0	0	0
Nymphaea colorata Peter	Nymphaeaceae	Nymphaeales	Genome	https://ngdc.cncb.ac.cn/search/?dbId=gwh&q=GWHAAYW00000000	nympcolongdc	1	0	0	0	1	1	2	3	0	1	0	0	0
Nelumbo nucifera Gaertn.	Nelumbonaceae	Proteales	Genome	https://genomevolution.org/CoGe/GenomeInfo.pl?gid=60468	nelunuci	5	0	0	0	6	2	1	4	0	2	0	0	0
Euryale ferox Salisb.	Nymphaeaceae	Nymphaeales	Genome	https://ngdc.cncb.ac.cn/search/?dbId=gwh&q=Euryale%20ferox	euryfero	2	0	0	0	5	3	1	5	0	2	0	0	0
Telopea speciosissima R.Br.	Proteaceae	Proteales	Genome	NCBI: Telopea speciosissima (assembly Tspe_v1)	telospec	13	0	0	0	5	2	1	13	0	4	0	0	0
Macadamia integrifolia Maiden & Betche	Proteaceae	Proteales	Genome	Genome assembly, SCU_Mint_v3, accessed from https://www.ncbi.nlm.nih.gov/datasets/genome/GCF_013358625.1/	macainte	6	0	0	0	3	2	6	11	0	6	0	0	0
Solanum lycopersicum L.	Solanaceae	Solanales	Genome	Phytozome Solanum lycopersicum ITAG4.0	sollyc	5	0	0	1	4	2	2	5	0	2	0	0	0
Dioscorea alata L.	Dioscoreaceae	Dioscoreales	Genome	Phytozome Dioscorea alata v2.1	dioscalata	3	1	1	1	2	1	1	4	0	6	1	2	0
Gnetum montanum Markgr.	Gnetaceae	Gnetales	Genome	https://datadryad.org/stash/dataset/doi:10.5061/dryad.0vm37	gnetmont	1	0	0	0	1	1	1	0	0	7	0	0	0
Cycas panzhihuaensis L.Zhou & S.Y.Yang	Cycadaceae	Cycadales	Genome	https://db.cngb.org/codeplot/datasets/public_dataset?id=PwRftGHfPs5qG3gE, accessed in July 15 2022	cycapanz	1	0	0	0	1	1	1	0	0	2	0	0	0
Alsophila spinulosa (Wall. ex Hook.) R.M.Tryon	Cyatheaceae	Cyatheales	Genome	https://doi.org/10.6084/m9.figshare.19075346	alsospin	0	0	0	0	2	2	0	0	0	0	0	2	0
Salvinia cucullata Bory	Salviniaceae	Salviniales	Genome	https://www.fernbase.org/ftp/ v1.2	salvcucu	0	0	0	0	2	1	0	0	0	0	0	0	0

## Sheet: Table S9
Table S9. Comparision of gene copy number.
Species	Gene	This study	Liao et al. 20221	Hao et al. 20232
Allium fistulosum	GSH1	7	7	10
	GSH2	1	1	1
	PCS	1	1	1
	GGT1-2	4	3	4
	GGT3
	FMO	NA	3	NA
	FMO1	1	NA	4
A. cepa	GSH1	5	7	5
	GSH2	2	1	1
	PCS	1	1	1
	GGT1	8	5	4
	GGT2-3
	FMO	NA	2	NA
	FMO1	3	NA	5
A. sativum	GSH1	4	7	4
	GSH2	2	1	1
	PCS	2	2	1
	GGT1	7	4	4
	GGT2-3
	FMO	NA	1	NA
	FMO1	1	NA	5
References
1. Liao, N. et al. Chromosome-level genome assembly of bunching onion illuminates genome evolution and flavor formation in Allium crops. Nat. Commun. 13, 6690 (2022).
2. Hao, F. et al. Chromosome-level genomes of three key Allium crops and their trait evolution. Nat. Genet. 55, 1976–1986 (2023).

[truncated: 5 more sheets: Table S10 Dup. type, Table S11 Expression, Table S12 Motif, Table S13 Site variation, Table S14 Active sites]
